# Supplementary material for: Macroscopic control of cell electrophysiology through ion channel expression
Source: eLife. 2022 Nov 9;11:e78075. doi: 10.7554/eLife.78075 (PMC9711524; doi:10.7554/eLife.78075)
Supplement: Figure 1—figure supplement 2—source data 1. [file elife-78075-fig1-figsupp2-data1.xlsx]

## Sheet: Panel A
control	100mM KCL	200mM KCL	400mM KCL
25476.8	18033.6	4234.44	1944.24
37504.8	18256.1	4734.76	1930.91
32726.2	16343.7	4890.33	1927.66
21651.8	13473.7	6458.29	1590.07
18224	13400.3	6877.45	1607.58
35749.1	12669.4	6027.36	1438.53
21837.3	13183	8280.9	1279.53
21837.3	18430.5	7185.86	1343.7
22178.6	17944.6	7727.75	1182.56

## Sheet: Panel B
control	200mM KCL	400mM KCL
1028.66	212.392	31.261
994.619	211.931	32.186
494.736	215.605	29.317
342.226	88.269	11.849
413.912	95.501	11.388
457.325	79.844	11.582
218.799	93.727	26.519
486.484	95.96	28.075
482.035	103.599	31.34

## Sheet: Panel C
control	200mM KCL	400mM KCL
274.611	90.622	0.549
268.902	11.253	0.507
272.308	10.227	0.495
272.481	4.145	0.557
262.493	3.609	0.376
264.796	4.127	0.25
300.14	1.712	0.015
294.804	1.844	0.019
284.671	1.363	0.541
