# Supplementary material for: Macroscopic control of cell electrophysiology through ion channel expression
Source: eLife. 2022 Nov 9;11:e78075. doi: 10.7554/eLife.78075 (PMC9711524; doi:10.7554/eLife.78075)
Supplement: Figure 1—figure supplement 3—source data 1. [file elife-78075-fig1-figsupp3-data1.xlsx]

## Sheet: Panel C
period(h)
4.76706
2.68332
3.15008
2.38136
3.74499
4.88927
2.1764
3.41384
3.18196
3.3014
4.46862
2.37887
3.4921
2.67969
3.37323
7.32795
1.42164
2.05827
3.72506
3.53506
2.79803
2.81016
2.31754
3.04612
3.3631
2.81367
3.43532
1.5829
2.03471
3.49473
3.08468
2.6178
5.7223
1.61397
3.93665
2.97789
3.13566
6.34977
2.44912
1.70136
3.86041
2.62473
5.81095
2.94919
3.51483
2.74454
2.7798
4.62888
2.17634
2.97102
2.18222
3.34255
4.29633
1.75516
2.48932
3.3248
2.7862
3.90903
5.81791
1.95284
3.97631
3.14535
2.52303
3.07674
3.86653
1.95284
2.35749
2.83618
2.89544
3.88636
2.00202
2.80681
3.05719
6.18252
2.55246
2.38684
2.87814
3.49375
7.05831
2.20126
2.97323
2.74752
4.08471
4.03719
1.88166
2.82296
3.87067
2.52996
3.67298
3.30799
2.69585
2.1372
2.49448
2.74251
3.37647
5.35885
2.35781
3.21113
3.32192
2.65568
6.0996
2.52411
2.54895
3.18624
3.31563
2.79803
2.81016
2.31754
3.04612
3.3631
2.81367
3.85193
1.1706
4.06148
2.49843
3.88305
2.63184
5.55582
3.46617
3.33491
3.70403
2.75602
2.21785
3.86601
2.91789
3.29138
3.59558
2.74804

## Sheet: Panel D
peak widths(h)
0.771517
8.22454
1.60894
1.89025
0.962784
1.58736
0.721455
7.05254
1.18349
1.34475
1.83562
1.81706
0.53235
8.11478
1.42984
1.98245
1.2207
1.71363
2.55008
0.837114
8.27984
1.13746
1.61196
1.37077
1.87664
1.80972
1.75533
1.73594
2.80285
1.89948
1.63051
1.33024
0.983219
8.18774
1.46517
1.92088
2.23228
1.58967
1.2961
6.48093
0.712726
1.58746
1.96701
1.67634
2.69029
2.14539
10.0301
1.28967
1.77295
1.97976
1.03432
4.18952
1.3186
1.86647
2.35484
1.5138
0.819822
1.2247
2.01186
1.61131
4.89985
1.67462
1.68271
0.35403
3.76101
1.34584
2.07282
1.73181
0.844558
1.52656
5.29433
0.177279
1.72633
1.82013
1.28294
1.89053
0.675401
0.659255
6.47901
1.61274
1.6921
1.02018
1.72047
1.0826
5.56382
1.36807
1.39336
1.92737
6.24743
1.56132
1.23692
1.64832
1.74755
1.68096
6.06929
1.91816
1.6829
0.841935
1.64426
2.16645
0.794964
2.05506
1.382
1.57793
1.45581
1.81434
2.13329
1.45351
1.588
8.70662
1.34854
1.22632
1.6756
1.46253
6.61563
1.47293
1.41572
2.03174
1.41142
2.25231
1.75164
6.34063
1.50316
1.63439
1.87602
1.87664
1.80972
1.75533
1.73594
2.80285
1.89948
1.63051
2.20053
4.28016
0.680546
2.03798
1.31105
1.52507
2.15657
2.14715
2.2946
1.37702
1.94052
1.01917
1.42059
2.24799
0.573464
2.43306
1.72135
2.03149
2.01272
0.506919

## Sheet: Panel E
peak amplitudes (a.u)
0.270189
1
0.84547
0.756653
0.454297
0.319196
0.404169
1
0.8436
0.599645
0.414017
0.478509
0.37892
1
0.890757
0.604749
0.534231
0.457112
0.709604
0.704751
1
0.780704
0.287262
0.648613
0.926025
0.603416
0.809554
0.908277
1
0.579873
0.847281
0.550267
0.904206
1
0.844235
0.627591
0.664313
0.607887
0.260658
1
0.812357
0.410556
0.434527
0.349722
0.355781
0.898828
1
0.882105
0.348143
0.51432
0.289695
1
0.666099
0.406128
0.561321
0.501312
0.726087
0.56643
0.75438
0.923527
0.984167
0.525832
0.64876
0.435916
0.648929
0.370418
0.590138
0.521041
0.831016
0.402243
1
0.671952
0.486289
0.57595
0.489987
0.717867
0.274137
0.56639
1
0.868464
0.631785
0.498368
0.253118
0.767364
1
0.563103
0.438059
0.719024
1
0.85637
0.639793
0.850635
0.891873
0.769442
1
0.769718
0.709223
0.329339
0.905265
1
0.404984
0.684393
0.325368
0.393019
0.45553
0.992867
0.679131
0.659453
0.789626
1
0.697529
0.537157
0.796623
0.30978
1
0.938133
0.625207
0.54372
0.341502
0.479545
0.856321
1
0.695847
0.730637
0.369682
0.926025
0.603416
0.809554
0.908277
1
0.579873
0.847281
0.929022
0.670823
0.64242
0.491335
0.254249
0.908203
1
0.902743
0.784138
0.373802
0.344999
0.522297
1
0.747225
0.247562
0.879698
0.771641
0.492206
0.138539
0.66679
