# Supplementary material for: Macroscopic control of cell electrophysiology through ion channel expression
Source: eLife. 2022 Nov 9;11:e78075. doi: 10.7554/eLife.78075 (PMC9711524; doi:10.7554/eLife.78075)
Supplement: Figure 1—source data 1. [file elife-78075-fig1-data1.xlsx]

## Sheet: Panel H
period (h)
4.76706
2.68332
3.15008
2.38136
3.74499
4.88927
2.1764
3.41384
3.18196
3.3014
4.46862
2.37887
3.4921
2.67969
3.37323
7.32795
1.42164
2.05827
3.72506
3.53506
2.79803
2.81016
2.31754
3.04612
3.3631
2.81367
3.43532
1.5829
2.03471
3.49473
3.08468
2.6178
5.7223
1.61397
3.93665
2.97789
3.13566
6.34977
2.44912
1.70136
3.86041
2.62473
5.81095
2.94919
3.51483
2.74454
2.7798
4.62888
2.17634
2.97102
2.18222
3.34255
4.29633
1.75516
2.48932
3.3248
2.7862
3.90903
5.81791
1.95284
3.97631
3.14535
2.52303
3.07674
3.86653
1.95284
2.35749
2.83618
2.89544
3.88636
2.00202
2.80681
3.05719
6.18252
2.55246
2.38684
2.87814
3.49375
7.05831
2.20126
2.97323
2.74752
4.08471
4.03719
1.88166
2.82296
3.87067
2.52996
3.67298
3.30799
2.69585
2.1372
2.49448
2.74251
3.37647
5.35885
2.35781
3.21113
3.32192
2.65568
6.0996
2.52411
2.54895
3.18624
3.31563
2.79803
2.81016
2.31754
3.04612
3.3631
2.81367
3.85193
1.1706
4.06148
2.49843
3.88305
2.63184
5.55582
3.46617
3.33491
3.70403
2.75602
2.21785
3.86601
2.91789
3.29138
3.59558
2.74804

## Sheet: Panel I
SI
0.607085
0.597826
0.588567
0.537037
0.435185
0.5
0.570048
0.564815
0.638889
0.504026
0.494767
0.662641
0.518519
0.570048
0.518519
0.513285
0.44847
0.634863
0.611111
0.435185
0.457729
0.564815
0.485507
