# Supplementary material for: Macroscopic control of cell electrophysiology through ion channel expression
Source: eLife. 2022 Nov 9;11:e78075. doi: 10.7554/eLife.78075 (PMC9711524; doi:10.7554/eLife.78075)
Supplement: Figure 2—figure supplement 6—source data 1. [file elife-78075-fig2-figsupp6-data1.xlsx]

## Sheet: Panel A
2h square	1h square	0.5h square
1.47403	0.752564	0.237593
1.52594	0.897523	0.305559
1.52839	0.904958	0.306192
1.58148	0.947059	0.319085
1.61564	0.961095	0.361571
1.66478	0.962153	0.362155
1.66683	0.962289	0.370539
1.6784	0.963722	0.374098
1.70354	0.964872	0.3885
1.71729	0.966643	0.390411
1.72546	0.967207	0.440344
1.72859	0.967612	0.440798
1.74873	0.967684	0.442879
1.75079	0.968408	0.446369
1.75148	0.968961	0.446721
1.75786	0.969022	0.446833
1.7632	0.969627	0.451221
1.76378	0.970018	0.452566
1.7675	0.970218	0.460682
1.76969	0.970226	0.489105
1.77019	0.970436	0.498713
1.77451	0.970692	0.504346
1.77537	0.971123	0.505006
1.77872	0.971611	0.505611
1.78305	0.971888	0.513446
1.78354	0.972055	0.519825
1.78844	0.972955	0.522694
1.78982	0.973151	0.523062
1.8257	0.97339	0.529096
1.82945	0.973458	0.530461
1.83114	0.973593	0.540757
1.83246	0.974338	0.54952
1.83802	0.974347	0.572904
1.83813	0.97452	0.574281
1.84316	0.974521	0.576156
1.86495	0.975197	0.576475
1.87353	0.975636	0.576632
1.87711	0.976204	0.579718
1.8777	0.976347	0.583529
1.87853	0.976844	0.583791
1.89074	0.977322	0.586868
1.89133	0.977527	0.587727
1.89505	0.977888	0.588171
1.89506	0.978241	0.588966
1.89909	0.978252	0.589159
1.90579	0.978263	0.590811
1.91079	0.978991	0.591339
1.9127	0.979077	0.591612
1.91491	0.979105	0.592144
1.91808	0.979315	0.592391
1.92067	0.979329	0.592596
1.92238	0.979348	0.592843
1.92255	0.979813	0.593261
1.92275	0.980142	0.593547
1.92384	0.980451	0.594133
1.92469	0.980793	0.594261
1.92756	0.982652	0.594358
1.93022	0.984209	0.595053
1.93074	0.984776	0.595178
1.93129	0.985527	0.59542
1.9316	0.985532	0.595537
1.93189	0.986437	0.595968
1.93255	0.987602	0.59601
1.93296	0.988158	0.596344
1.93308	0.988468	0.596392
1.93317	0.988524	0.596414
1.93393	0.989625	0.596429
1.93613	0.99337	0.596694
1.93767	0.996064	0.596735
1.9378	0.996511	0.596756
1.93863	1.0012	0.596883
1.93921	1.03547	0.597054
1.93963	1.04593	0.59737
1.93979	1.04854	0.597372
1.94044	1.05031	0.597487
1.94046	1.05069	0.597756
1.9414	1.052	0.59799
1.94188	1.05203	0.598002
1.94253	1.05462	0.598976
1.9431	1.05519	0.599006
1.9431	1.0555	0.599191
1.94314	1.05567	0.599272
1.94361	1.05586	0.599788
1.94458	1.05612	0.599946
1.94537	1.05627	0.600154
1.94549	1.05657	0.600301
1.94788	1.05672	0.600851
1.9482	1.05677	0.60137
1.94821	1.05679	0.601859
1.94825	1.05804	0.602051
1.94839	1.05807	0.602126
1.94881	1.05861	0.602166
1.94906	1.05912	0.602745
1.9492	1.0593	0.603056
1.94981	1.05946	0.603803
1.94991	1.05949	0.603894
1.95177	1.05957	0.604024
1.95247	1.05964	0.605223
1.95275	1.05969	0.605265
1.95287	1.05979	0.606199
1.95372	1.06026	0.606254
1.95384	1.06041	0.607076
1.95388	1.06073	0.60716
1.95426	1.06079	0.607395
1.95472	1.0608	0.607793
1.95532	1.06083	0.608872
1.95629	1.06083	0.609193
1.95755	1.06097	0.611299
1.95847	1.06132	0.611764
1.95859	1.06143	0.613949
1.95875	1.06152	0.62593
1.95883	1.06152	0.626364
1.95893	1.06193	0.651248
1.95974	1.06236	0.657858
1.95975	1.06239	0.662856
1.96123	1.06341	0.663228
1.96172	1.06343	0.664716
1.9629	1.06353	0.665011
1.96411	1.06409	0.665128
1.96426	1.06442	0.665362
1.96572	1.06457	0.667149
1.96655	1.06467	0.667348
1.96687	1.06485	0.66823
1.96753	1.0652	0.669359
1.9728	1.0653	0.670637
1.97549	1.06574	0.671252
1.97614	1.06574	0.671593
1.97692	1.06583	0.671676
1.97773	1.0668	0.673047
1.97813	1.06701	0.673445
1.97864	1.06744	0.674505
1.97993	1.06744	0.674729
1.98966	1.06814	0.675615
1.99048	1.06878	0.676018
1.99631	1.06898	0.67605
2.00003	1.07026	0.676146
2.00601	1.07121	0.67621
2.04097	1.07246	0.676311
2.06275	1.07269	0.676356
2.06446	1.0742	0.676545
2.06639	1.07518	0.676829
2.06795	1.07665	0.676849
2.07719	1.07763	0.677175
2.07775	1.07873	0.677288
2.08053	1.07898	0.677291
2.08088	1.0792	0.677425
2.08109	1.09454	0.677743
2.08375	1.13127	0.678105
2.08891	1.14351	0.678133
2.09323	1.1458	0.678175
2.09478	1.14766	0.678787
2.0959	1.14924	0.678823
2.09612	1.15236	0.678893
2.09635	1.15268	0.679051
2.09712	1.15521	0.679064
2.09742	1.1563	0.679349
2.09786	1.15993	0.67947
2.09818	1.16299	0.679551
2.09869	1.1806	0.679566
2.09957	1.25865	0.679617
2.09985	1.12329	0.679663
2.10025		0.679672
2.10027		0.679839
2.10031		0.679847
2.10239		0.679905
2.10324		0.679919
2.10382		0.680026
2.10407		0.680128
2.10562		0.680184
2.10563		0.680285
2.10601		0.68031
2.10603		0.680486
2.10701		0.680636
2.1071		0.680758
2.10729		0.680826
2.10801		0.680876
2.10956		0.681004
2.10972		0.681067
2.10972		0.68108
2.11197		0.681156
2.1124		0.681262
2.11307		0.681283
2.11316		0.681365
2.11409		0.681449
2.1154		0.681461
2.11635		0.68147
2.1164		0.681486
2.11737		0.68149
2.11758		0.681524
2.11775		0.681583
2.12091		0.681633
2.12093		0.681773
2.12095		0.681828
2.12263		0.681884
2.12443		0.681915
2.12466		0.681974
2.1284		0.682088
2.12894		0.682107
2.13048		0.682138
2.13476		0.682334
2.13846		0.682358
2.14082		0.682382
2.14121		0.682477
2.14551		0.682501
2.14695		0.682745
2.1534		0.682861
2.15702		0.682905
2.15773		0.682935
2.1587		0.683014
2.16344		0.683194
2.164		0.683291
2.17018		0.683454
2.17179		0.683472
2.26588		0.683592
2.26749		0.683622
2.28023		0.683796
2.28564		0.683994
2.30098		0.684007
2.31106		0.684214
2.33455		0.684334
2.37229		0.684409
2.42753		0.684421
2.50454		0.68446
		0.684523
		0.684959
		0.685381
		0.685892
		0.686225
		0.686227
		0.686622
		0.686681
		0.68708
		0.687248
		0.68747
		0.687707
		0.688055
		0.688266
		0.688654
		0.688689
		0.688704
		0.688885
		0.689272
		0.689287
		0.689361
		0.689393
		0.690044
		0.69055
		0.690612
		0.690953
		0.691233
		0.691547
		0.692182
		0.692444
		0.692464
		0.693313
		0.69337
		0.693783
		0.693784
		0.694141
		0.694838
		0.696634
		0.697233
		0.69853
		0.69868
		0.698786
		0.704082
		0.707312
		0.759908
		0.7645
		0.765785
		0.767177
		0.769732
		0.769804
		0.769886
		0.769924
		0.771202
		0.774694
		0.778943
		0.866557

## Sheet: Panel B
2h square	2h sine	1h square	1h sine	0.5h square	0.5h sine
0.188789	0.174707	0.145759	0.0893294	0.260147	0.152628
0.286426	0.217651	0.252927	0.199799	0.287276	0.16503
0.315826	0.238635	0.278798	0.213185	0.303311	0.171385
0.364508	0.241821	0.284731	0.218176	0.361952	0.18748
0.374009	0.248677	0.292719	0.270303	0.399637	0.208724
0.382325	0.252494	0.334299	0.272412	0.419392	0.211059
0.389911	0.268691	0.383693	0.279226	0.429013	0.220192
0.405068	0.281243	0.387341	0.296687	0.42932	0.255991
0.40953	0.285861	0.412184	0.298713	0.435836	0.260786
0.417724	0.309191	0.458312	0.29916	0.442959	0.268514
0.425499	0.325513	0.46015	0.301723	0.444163	0.273432
0.450356	0.328738	0.470232	0.307716	0.456245	0.273993
0.45436	0.335453	0.471523	0.326075	0.462124	0.275842
0.454972	0.33659	0.47761	0.328643	0.476466	0.276679
0.46161	0.336849	0.477953	0.346643	0.477645	0.279013
0.479429	0.350854	0.479635	0.35263	0.485923	0.280653
0.48266	0.35473	0.493135	0.375042	0.489897	0.283238
0.498191	0.38158	0.495999	0.37783	0.490182	0.287179
0.50381	0.385949	0.505305	0.387798	0.499991	0.291109
0.505294	0.389177	0.505896	0.391583	0.503618	0.292079
0.510091	0.391578	0.512789	0.401476	0.506212	0.297771
0.51816	0.39725	0.556623	0.427501	0.507374	0.303392
0.521103	0.405327	0.563121	0.431254	0.512983	0.304986
0.527277	0.406195	0.564051	0.433773	0.513312	0.306572
0.53029	0.418561	0.567347	0.440196	0.518982	0.31197
0.536512	0.420942	0.56775	0.457721	0.520276	0.311983
0.538643	0.426393	0.568646	0.460982	0.535529	0.317672
0.542366	0.43083	0.570614	0.463104	0.550615	0.31821
0.5447	0.433258	0.572255	0.470366	0.551984	0.319874
0.547955	0.433541	0.574127	0.475096	0.554674	0.321216
0.549187	0.438298	0.578525	0.479164	0.555929	0.323626
0.549703	0.440791	0.579383	0.47935	0.56406	0.324487
0.555747	0.44199	0.57971	0.490062	0.568462	0.325014
0.559898	0.450813	0.58396	0.493086	0.568972	0.325542
0.563415	0.460976	0.595402	0.497667	0.569019	0.327345
0.563596	0.461044	0.596709	0.500906	0.569476	0.332755
0.571427	0.470706	0.597475	0.510118	0.571206	0.336559
0.573771	0.470755	0.597803	0.516624	0.57155	0.338677
0.578587	0.471944	0.6002	0.517743	0.572872	0.340087
0.578784	0.473069	0.601106	0.518261	0.587606	0.340583
0.582951	0.48006	0.607771	0.521285	0.588317	0.345169
0.587506	0.482047	0.613672	0.548591	0.593891	0.349332
0.587578	0.483406	0.613849	0.560684	0.599638	0.355755
0.591855	0.490527	0.617361	0.562365	0.601787	0.356167
0.594966	0.492266	0.61968	0.567361	0.602234	0.360576
0.596022	0.494477	0.620565	0.567729	0.602876	0.361609
0.600886	0.503493	0.621638	0.56796	0.613527	0.364284
0.602722	0.503857	0.628047	0.56931	0.614484	0.365744
0.607955	0.509962	0.631828	0.584404	0.618376	0.369334
0.608669	0.520876	0.632672	0.602499	0.620038	0.375462
0.616959	0.521522	0.6337	0.603528	0.62047	0.379899
0.619723	0.533032	0.636121	0.60755	0.621312	0.380568
0.620074	0.533122	0.636475	0.614869	0.6233	0.380746
0.629795	0.536298	0.636867	0.61694	0.624754	0.382617
0.632592	0.5385	0.636922	0.619313	0.627562	0.382766
0.633194	0.541602	0.640774	0.619461	0.628372	0.387962
0.637891	0.542779	0.640944	0.626614	0.63019	0.38938
0.647934	0.544604	0.641186	0.627167	0.631971	0.390669
0.650871	0.5489	0.642705	0.629505	0.639833	0.395562
0.651062	0.553966	0.648402	0.632796	0.641855	0.39658
0.651698	0.557447	0.649251	0.634725	0.646154	0.397603
0.652404	0.557573	0.650522	0.641683	0.64792	0.398531
0.655872	0.56576	0.652507	0.643754	0.649202	0.402977
0.656784	0.571512	0.652668	0.646214	0.649296	0.404936
0.659097	0.575698	0.65592	0.648782	0.649816	0.406394
0.660141	0.577307	0.66514	0.649235	0.6501	0.407115
0.660937	0.580587	0.665771	0.649734	0.65017	0.409803
0.66096	0.58522	0.667174	0.654049	0.654129	0.412266
0.663231	0.585302	0.668161	0.655369	0.654771	0.414561
0.663991	0.58735	0.669095	0.661683	0.655185	0.414649
0.666102	0.588605	0.670602	0.663678	0.657183	0.417861
0.667723	0.592186	0.670867	0.665297	0.65859	0.41956
0.673153	0.595306	0.676541	0.666884	0.660808	0.424008
0.673401	0.595476	0.681252	0.669557	0.668722	0.424279
0.67376	0.608342	0.683431	0.676612	0.670936	0.425416
0.674881	0.612294	0.69296	0.679413	0.676127	0.427288
0.677826	0.620491	0.696784	0.681992	0.680153	0.430173
0.678508	0.624809	0.699478	0.686967	0.684698	0.431883
0.680941	0.626374	0.700751	0.688618	0.688173	0.432022
0.68335	0.628239	0.703261	0.690254	0.690748	0.432348
0.689047	0.631436	0.704307	0.690679	0.694009	0.434173
0.690263	0.63856	0.70955	0.692177	0.695175	0.436095
0.691769	0.639947	0.713706	0.693969	0.69535	0.437927
0.692644	0.640204	0.715384	0.696181	0.696801	0.43929
0.693418	0.641636	0.716385	0.697116	0.697079	0.44107
0.695839	0.643253	0.721682	0.697591	0.697306	0.44321
0.696855	0.650446	0.725638	0.698835	0.699303	0.450581
0.697085	0.654973	0.727143	0.70365	0.699331	0.451082
0.697928	0.662679	0.72779	0.706599	0.699839	0.453726
0.698086	0.67012	0.729793	0.710821	0.700248	0.453848
0.698423	0.670215	0.731206	0.712763	0.700892	0.454253
0.698445	0.670357	0.731616	0.713127	0.702929	0.466102
0.701824	0.672515	0.73185	0.713426	0.706679	0.467026
0.703097	0.672552	0.731906	0.713924	0.709145	0.471824
0.703505	0.673671	0.733246	0.727715	0.711421	0.474576
0.707419	0.674878	0.735777	0.737155	0.712538	0.474968
0.710749	0.67647	0.739894	0.742653	0.713851	0.477627
0.711435	0.681548	0.74612	0.746548	0.713867	0.477998
0.713923	0.681741	0.746656	0.746816	0.718285	0.481654
0.714368	0.682416	0.747823	0.747415	0.718875	0.483005
0.714558	0.683136	0.747843	0.75057	0.72	0.483082
0.716828	0.690003	0.751137	0.752119	0.720143	0.483154
0.71708	0.698132	0.752521	0.75254	0.722683	0.483357
0.717358	0.702429	0.754881	0.753137	0.726816	0.486581
0.71816	0.702937	0.755385	0.754868	0.728448	0.48858
0.718509	0.708382	0.755482	0.757543	0.729261	0.48859
0.720183	0.709907	0.759518	0.757874	0.731366	0.492244
0.722054	0.713966	0.760692	0.758248	0.74032	0.495335
0.728702	0.715003	0.761524	0.760133	0.744319	0.496683
0.728978	0.719947	0.762155	0.761406	0.744363	0.49717
0.729097	0.723862	0.763335	0.76323	0.744792	0.497475
0.730152	0.724733	0.764115	0.766904	0.745355	0.497729
0.730428	0.730376	0.765162	0.768887	0.746157	0.502544
0.730616	0.731624	0.772705	0.769451	0.74632	0.505518
0.732507	0.732031	0.783013	0.776581	0.747354	0.506235
0.732915	0.733002	0.788623	0.781921	0.74837	0.506722
0.737426	0.733279	0.789573	0.783908	0.749907	0.507131
0.738742	0.734114	0.793752	0.786428	0.750034	0.508114
0.739898	0.736721	0.796904	0.789548	0.750457	0.508626
0.747553	0.73751	0.798675	0.799341	0.750746	0.508654
0.747554	0.740045	0.801056	0.800347	0.754278	0.509676
0.748596	0.743256	0.809309	0.801157	0.754868	0.511662
0.749495	0.748208	0.811987	0.802021	0.75584	0.512882
0.756458	0.748664	0.813195	0.802167	0.756919	0.512929
0.758309	0.750458	0.813945	0.807599	0.75942	0.514279
0.759631	0.752679	0.815113	0.809224	0.763052	0.515787
0.760513	0.753352	0.816225	0.811921	0.765652	0.515965
0.76059	0.75542	0.818004	0.814121	0.766714	0.519743
0.764152	0.758735	0.821587	0.814242	0.766964	0.522713
0.766576	0.759598	0.821863	0.814442	0.767595	0.523131
0.766673	0.76102	0.822414	0.814927	0.772384	0.523857
0.771466	0.765558	0.825039	0.817109	0.773178	0.52468
0.773176	0.765575	0.82575	0.820366	0.776101	0.52494
0.773389	0.766823	0.833241	0.820943	0.779255	0.525929
0.774458	0.768821	0.840459	0.821677	0.779303	0.529462
0.775201	0.770116	0.840839	0.826321	0.782614	0.53003
0.77527	0.773489	0.841263	0.826822	0.783011	0.531049
0.778689	0.774718	0.842582	0.829135	0.783938	0.531468
0.778741	0.774974	0.844061	0.832829	0.785889	0.532897
0.780116	0.775017	0.844748	0.836986	0.78618	0.533901
0.78013	0.775089	0.847675	0.843783	0.787775	0.535648
0.785781	0.780288	0.849188	0.84775	0.788477	0.536122
0.787611	0.781286	0.84979	0.854977	0.788601	0.536153
0.791043	0.782794	0.852838	0.856665	0.790339	0.540395
0.791211	0.787879	0.871703	0.857927	0.791503	0.5416
0.79181	0.78829	0.873055	0.858148	0.792481	0.54162
0.79413	0.788587	0.874359	0.859339	0.792975	0.54222
0.795464	0.78993	0.880201	0.860295	0.793215	0.547303
0.796757	0.792502	0.885775	0.861031	0.793263	0.54981
0.797279	0.795601	0.885978	0.86315	0.793969	0.553175
0.798414	0.795736	0.887202	0.864915	0.794069	0.555258
0.798582	0.797045	0.889802	0.868348	0.795112	0.558459
0.80232	0.800041	0.890497	0.870701	0.798184	0.559243
0.804176	0.800533	0.891669	0.874753	0.800957	0.559749
0.805454	0.800585	0.912259	0.877436	0.803182	0.559786
0.80717	0.802201	0.918747	0.878828	0.804567	0.560247
0.808234	0.805226	0.920178	0.883102	0.805308	0.560293
0.811607	0.806756	0.920907	0.887139	0.806203	0.560377
0.814481	0.809588	0.924995	0.890337	0.807033	0.563336
0.814772	0.817221	0.929481	0.90063	0.807633	0.563968
0.816632	0.817608	0.935545	0.903028	0.808201	0.564038
0.816994	0.81845	0.935983	0.904303	0.811814	0.566185
0.817537	0.818782	0.941425	0.905834	0.813877	0.567928
0.819387	0.820378	0.944725	0.923014	0.81547	0.568375
0.829347	0.821706	0.951412	0.924171	0.815702	0.569291
0.833101	0.821891	0.955006	0.929835	0.815812	0.570039
0.833745	0.825364	0.960938	0.937729	0.818526	0.57303
0.835944	0.826104	0.986672	0.945251	0.820407	0.573247
0.838762	0.83157	0.988555	0.946816	0.821667	0.574601
0.839402	0.833278	1	0.948109	0.825309	0.575253
0.841333	0.833942	1	0.948321	0.826905	0.576937
0.842078	0.834988	1	0.948993	0.82902	0.577496
0.842822	0.835615	1	0.949761	0.829258	0.577595
0.844605	0.839696	1	0.949796	0.829813	0.579547
0.845149	0.840144	1	0.954341	0.831479	0.581172
0.846823	0.843151	1	0.955667	0.831558	0.58184
0.851253	0.844422	1	0.961145	0.834303	0.582238
0.854196	0.847963	1	0.96159	0.836584	0.582355
0.855683	0.850065	1	0.963652	0.837278	0.583085
0.859977	0.851787	1	0.965161	0.837601	0.583376
0.863079	0.855653	1	0.972782	0.838682	0.584643
0.86611	0.860236	1	0.973634	0.838794	0.587939
0.871962	0.86761	1	0.975298	0.840582	0.591475
0.875807	0.870607	1	0.982033	0.841159	0.597673
0.877386	0.874822	1	0.984342	0.843144	0.598537
0.882487	0.87665	1	0.987552	0.84374	0.603956
0.887774	0.876687	1	0.990401	0.843792	0.605118
0.888375	0.88282	1	0.992076	0.844152	0.605485
0.888812	0.883085		0.992976	0.844753	0.606084
0.890235	0.89071		0.993926	0.846678	0.60618
0.890621	0.893141		0.995057	0.851079	0.608886
0.891491	0.893173		1	0.85282	0.608942
0.903044	0.893999		1	0.854688	0.609746
0.903173	0.894002		1	0.855899	0.612324
0.9038	0.895019		1	0.857886	0.615518
0.904659	0.907681		1	0.860001	0.624569
0.907432	0.913208		1	0.863536	0.625277
0.911392	0.915086		1	0.864198	0.625799
0.911461	0.9212		1	0.864211	0.627001
0.917205	0.921496		1	0.865268	0.628295
0.919433	0.921634		1	0.865764	0.630699
0.921704	0.923931		1	0.867023	0.632469
0.927453	0.925481		1	0.868164	0.63566
0.929095	0.925967		1	0.868609	0.635884
0.929324	0.927598		1	0.869289	0.638016
0.933348	0.928909		1	0.869354	0.639003
0.933452	0.929079		1	0.869731	0.63974
0.937114	0.935961		1	0.870092	0.63989
0.937787	0.937254		1	0.87347	0.639926
0.947374	0.937736		1	0.873659	0.642145
0.948862	0.941076		1	0.874101	0.642252
0.951005	0.942852		1	0.875516	0.643428
0.952065	0.945653		1	0.876067	0.64382
0.955725	0.947418		1	0.877776	0.643976
0.95844	0.948786		1	0.878222	0.644152
0.96735	0.953839			0.87922	0.648481
0.96831	0.960349			0.883655	0.648487
0.971022	0.962489			0.884496	0.648633
0.980995	0.966906			0.884555	0.651745
0.986903	0.977138			0.887484	0.66014
0.98841	0.978791			0.887793	0.661911
0.990801	0.985108			0.887994	0.66197
0.992753	0.999049			0.890785	0.664732
0.995154	1			0.891182	0.672827
1	1			0.893833	0.672888
1	1			0.894005	0.674769
1	1			0.894093	0.675402
1	1			0.895632	0.680627
1	1			0.895859	0.68233
1	1			0.895945	0.683488
1	1			0.896293	0.684217
1	1			0.900322	0.685385
1	1			0.9013	0.687326
1	1			0.901437	0.693265
1	1			0.903208	0.694765
1	1			0.905499	0.700135
1	1			0.905811	0.701635
1	1			0.905932	0.70433
1	1			0.908658	0.706557
1	1			0.913182	0.708684
1	1			0.921996	0.710409
1	1			0.922476	0.711013
1	1			0.923202	0.714069
1	1			0.923296	0.715575
1	1			0.924958	0.71877
1	1			0.928189	0.721214
1				0.929392	0.728
1				0.931239	0.732548
1				0.931441	0.737092
1				0.931587	0.748917
1				0.940687	0.751757
1				0.943087	0.752161
				0.943598	0.752611
				0.951844	0.757348
				0.951858	0.75831
				0.952357	0.7596
				0.954389	0.760168
				0.955489	0.768623
				0.956171	0.770724
				0.956182	0.7737
				0.958394	0.779356
				0.960442	0.783573
				0.967882	0.795219
				0.968605	0.795416
				0.97052	0.796431
				0.971342	0.803618
				0.973929	0.804805
				0.97412	0.806241
				0.975803	0.808704
				0.976184	0.809383
				0.978358	0.813065
				0.978796	0.813413
				0.981418	0.819118
				0.982551	0.820504
				0.983705	0.825337
				0.988828	0.832099
				0.991762	0.835184
				0.993761	0.844218
				0.99571	0.850081
				0.997182	0.850821
				0.997735	0.853778
				0.997992	0.860232
				1	0.860537
				1	0.860696
				1	0.861815
				1	0.866218
				1	0.873295
				1	0.873959
				1	0.874353
				1	0.878327
				1	0.879035
				1	0.880686
				1	0.894998
				1	0.906834
				1	0.913826
				1	0.919133
				1	0.936766
				1	0.956644
				1	0.960388
				1	0.962815
				1	0.968451
				1	0.979239
				1	0.983283
				1	0.983598
				1	0.987108
				1	0.987311
				1	0.997884
				1	1
				1	1
				1	1
				1	1
				1	1
				1	1
				1	1
				1	1
				1	1
				1	1
				1	1
				1	1
					1
					1
					1
					1
					1
					1
					1
					1
					1
					1
					1
					1

## Sheet: Panel C
2h square	2h sine	1h square	1h sine	0.5h square	0.5h sine
1.13375	0.644584	0.500351	0.597366	0.300426	0.134108
1.14081	0.952932	0.542739	0.55974	0.304253	0.24298
0.987483	1.33137	0.51983	0.649823	0.279623	0.267246
1.0669	1.00192	0.530877	0.557592	0.336983	0.26196
1.06093	1.03643	0.568089	0.550129	0.390109	0.267612
0.964625	1.0871	0.424198	0.541845	0.262857	0.215121
1.68917	0.741816	0.397106	0.520363	0.34427	0.429162
1.07007	0.993296	0.577089	0.58108	0.348155	0.239422
0.958454	1.31026	0.462769	0.394223	0.244517	0.249062
1.072	0.616268	0.474196	0.473015	0.28315	0.27841
1.18286	1.15754	0.503815	0.573653	0.320981	0.248841
1.15421	0.973574	0.692302	0.577401	0.341057	0.246296
1.2369	0.955401	0.468958	0.704169	0.704057	0.0489112
1.09892	1.11839	0.431765	0.494241	0.257222	0.0672925
1.13675	1.08158	0.463371	0.516149	0.320962	0.188393
1.15841	1.20707	0.484724	0.541625	0.312816	0.23815
1.21594	0.674801	0.479315	0.527976	0.146938	0.204764
1.03732	1.35005	0.499559	0.550789	0.26043	0.258672
1.10348	0.286281	0.400599	0.588313	0.934964	0.234407
1.10947	0.84083	0.293358	0.63885	0.302917	0.281263
1.15281	0.891988	0.514335	0.569406	0.285817	0.243982
1.21161	1.02057	0.523613	0.536276	0.448436	0.257699
1.13612	0.976643	0.519813	0.523684	0.294317	0.268848
1.13269	1.18477	0.487805	0.72056	0.143986	0.239746
1.23948	1.0899	0.44928	0.609999	0.259046	0.223498
1.06996	0.95368	0.590763	0.53526	0.439824	0.108149
1.12243	1.82205	0.53134	0.574277	0.235655	0.11898
0.856807	0.46538	0.527409	0.590105	0.967324	0.218265
1.04071	1.06149	0.479408	0.58492	0.232137	0.290003
1.08336	1.03783	0.512866	0.58236	0.28106	0.272483
1.05465	1.16613	0.496448	0.574951	0.346463	0.253038
1.07484	1.36733	0.4948	0.601242	0.264887	0.243688
3.94405	0.903608	0.615178	0.524998	0.288789	0.264829
1.05436	0.787584	0.515971	0.573452	0.31849	0.268759
1.03465	0.707391	0.515941	0.425801	0.972242	0.275415
1.0437	1.48633	0.418475	0.492555	0.336907	0.264904
0.567985	0.293126	0.460855	0.561514	0.382039	0.233621
1.04748	0.927544	0.726401	0.750178	0.29272	0.262388
1.3032	0.895181	0.540741	0.531451	0.294953	0.056514
1.12506	0.942997	0.413793	0.576894	0.197197	0.100969
0.978704	1.03213	0.485837	0.563078	0.229685	0.241452
1.07076	0.988697	0.48248	0.50024	0.319345	0.265916
1.59868	0.989832	0.53745	0.523693	0.285405	0.278422
1.11737	3.49107	0.527473	0.505794	0.329596	0.247871
1.25247	0.812424	0.574354	0.490502	0.296828	0.262773
0.683922	0.563381	0.540098	0.520093	0.297673	0.271067
1.00937	1.00085	0.445147	0.880796	0.319671	0.265048
0.870933	1.09043	0.427544	0.439281	0.313899	0.370929
1.05423	1.04199	0.522905	0.547342	0.248275	0.280061
1.45852	1.05162	0.519817	0.410142	0.26643	0.261573
1.15022	0.98751	0.50358	0.399743	0.874582	0.237159
1.12693	1.1495	0.474483	0.459159	0.279875	0.128611
1.31597	0.6609	0.568077	0.925877	0.278718	0.114824
1.1799	1.81453	0.457664	0.438863	0.296644	0.226155
0.573725	0.70684	0.410558	0.502489	0.322247	0.25625
0.473685	1.25397	0.507886	0.556135	0.370702	0.245372
1.14755	1.10591	0.539483	0.466418	0.314438	0.333572
0.971931	1.0609	0.492845	0.511418	0.347649	0.25833
1.24898	1.14481	0.492725	0.637729	0.331889	0.259003
1.03137	1.15761	0.521928	0.441168	0.324775	0.274061
0.958833	1.0387	0.484887	0.516865	0.354345	0.277977
1.78657	0.532064	0.405496	0.496024	0.322314	0.272895
0.919259	1.5582	0.559888	0.49479	0.244792	0.25672
0.83348	0.46613	0.480298	0.669263	0.214383	0.253967
1.10514	1.0856	0.537871	0.184541	0.312797	0.0689362
1.07089	1.004	0.53755	0.412987	0.283088	0.0641184
1.23447	1.07097	0.609149	0.475147	0.327991	0.211114
1.30519	1.35747	0.478975	0.471474	0.271569	0.256576
1.1548	1.11518	0.435862	0.472882	0.295306	0.254828
1.10754	1.07468	0.544717	0.590505	0.297411	0.335887
1.22738	1.0004	0.509733	0.543398	0.244227	0.228127
1.11028	1.23919	0.463464	0.597143	0.289431	0.261066
0.823771	0.799069	0.488286	0.468238	0.339205	0.213626
0.782816	1.11857	0.563138	0.480231	0.586482	0.238603
1.10257	1.05401	0.549644	0.582389	0.306696	0.347217
1.1068	1.03381	0.374978	0.522931	0.299376	0.261603
1.22402	1.2292	0.513076	0.654518	0.351038	0.240302
1.26811	0.738863	0.557142	0.523274	0.329223	0.13694
1.09399	0.694265	0.516539	0.230251	0.299474	0.196375
1.03001	1.52929	0.505957	0.556678	0.325828	0.344879
1.23327	0.732254	0.552105	0.497229	0.285326	0.195618
0.765217	0.414788	0.506264	0.56302	0.327635	0.272854
1.15605	1.01492	0.451047	0.470689	0.282925	0.214876
1.09666	1.47842	0.548192	0.403525	0.308969	0.744058
1.07288	0.959316	0.572275	0.477987	0.318755	0.184812
1.07068	1.2446	0.526531	0.568846	0.315718	0.308216
1.10399	0.842267	0.606621	0.437252	0.263046	0.760089
1.61214	0.786917	0.549872	0.892731	0.327419	0.195201
0.807616	0.76669	0.492164	0.503565	0.377066	0.247277
0.846917	1.61037	0.476798	0.485375	0.350052	0.17323
0.561001	1.15962	0.484695	0.587259	0.350763	0.0460283
0.695963	1.03378	0.587352	0.586889	0.383295	0.260599
1.06012	0.824697	0.597262	0.588373	0.404184	0.249622
1.01724	0.99586	0.48327	0.55429	0.333718	0.276319
1.06188	1.07554	0.616166	0.567664	0.344699	0.27159
0.982098	0.828172	0.547365	0.548521	0.336155	0.276323
1.06719	1.02586	0.540764	0.561387	0.348945	0.268717
1.07193	1.43957	0.573353	0.527481	0.36352	0.26019
1.22073	0.368809	0.526149	0.702425	0.402033	0.281379
0.857939	1.20609	0.563804	0.481184	0.297071	0.259863
1.13345	1.06415	0.547869	0.643732	0.324239	0.278664
1.10271	0.717976	0.566927	0.53015	0.311866	0.247314
1.33642	1.12349	0.530476	0.535078	0.25685	0.19787
1.02283	0.984872	0.490485	0.510482	0.168912	0.0746034
1.07895	0.869015	0.552688	0.491068	0.332189	0.24788
1.19424	0.560339	0.528672	0.589486	0.179948	0.253424
1.00343	1.62437	0.529716	0.548501	0.195758	0.252609
1.18126	0.756038	0.54158	0.675848	0.240286	0.279249
0.835406	1.15068	0.522516	0.580191	0.321876	0.255469
1.16252	1.10209	0.547349	0.496229	0.379074	0.265632
0.997065	1.07037	0.538868	0.5511	0.359738	0.243005
1.18749	0.804309	0.513119	0.600291	0.380085	0.512526
1.13986	0.818547	0.546993	0.475313	0.322662	0.26879
1.22818	0.944342	0.511694	0.495284	0.290801	0.165379
1.46056	0.71007	0.519659	0.469901	0.363968	0.128237
1.0619	1.71192	0.702728	0.544877	0.34254	0.0765819
1.1079	0.75403	0.509076	0.471189	0.298543	0.184331
0.874603	0.907159	0.500224	0.540395	0.277015	0.343015
0.992752	1.13071	0.576428	0.641301	0.061115	0.211421
1.08804	1.13148	0.52233	0.397638	0.26504	0.267485
1.09471	1.6077	0.537	0.476833	0.328835	0.213978
1.05429	1.01741	0.571045	0.539523	0.327076	0.336394
1.11325	1.06826	0.546177	0.52349	0.354644	0.218719
1.33095	0.855547	0.505274	0.455576	0.350657	0.269466
1.15493	0.762079	0.545646	0.496426	0.348659	0.273268
1.17566	0.745007	0.551534	0.44265	0.337692	0.282678
1.05628	0.960469	0.55243	0.92449	0.246835	0.394129
1.12307	1.01555	0.593986	0.500983	0.217343	0.156096
1.17502	1.17798	0.543082	0.57819	0.334281	0.0514027
1.17651	1.4412	0.526665	0.527869	0.35102	0.183555
1.03634	0.971634	0.542125	0.54344	0.424056	0.337706
1.19983	1.03342	0.483275	0.548988	0.359183	0.257403
1.14664	0.846584	0.508203	0.518357	0.330142	0.251034
0.977238	1.02102	0.658705	0.321262	0.289305	0.245461
1.02389	0.184135	0.418272	0.543961	0.306597	0.301283
1.15135	0.701931	0.529649	0.602242	0.282689	0.350142
1.08432	1.01523	0.599323	0.45725	0.312381	0.226865
1.35686	2.25935	0.425446	0.369645	0.305909	0.246374
1.16071	1.07647	0.321397	0.383202	0.317303	0.241008
1.08564	1.05182	0.509882	0.404563	0.348156	0.376349
1.15209	1.17063	0.555012	0.568073	0.333008	0.146641
1.12497	1.13637	0.530943	0.575495	0.338377	0.135466
1.08677	0.657872	0.6503	0.529648	0.399856	0.228911
1.07077	0.864328	0.560147	0.584834	0.286596	0.301557
0.751139	0.742126	0.492235	0.464485	0.358813	0.258394
1.01075	1.07397	0.521381	0.461983	0.562602	0.316419
1.09625	1.0468	0.503652	0.4943	0.339319	0.283477
1.04575	0.618115	0.547157	0.512591	0.345443	0.26097
1.0698	0.836573	0.815591	0.567366	0.318337	0.243455
1.41538	2.55656	0.496326	0.640816	0.345739	0.258027
0.975974	0.912878	0.454091	0.470177	0.343369	0.290015
3.51779	0.802438	0.522323	0.600924	0.345131	0.232343
1.11352	0.930986	0.581463	0.169854	0.407576	0.217979
0.484443	0.900872	0.504214	0.571326	0.347378	0.0666661
0.792698	0.961178	0.53807	0.506911	0.329532	0.122421
0.97739	1.06988	0.533678	0.657703	0.368629	0.238792
1.34759	0.742127	0.474679	0.478743	0.335198	0.253037
0.987208	3.57053	0.473975	0.53323	0.396508	0.272979
1.09949	0.553007	0.558626	0.407885	0.344195	0.266546
1.24172	1.02815	0.383415	0.569082	0.344567	0.278315
1.43409	0.980606	0.338094	0.571922	0.386946	0.258806
1.09049	1.04679	0.532048	0.593168	0.366328	0.251457
0.655049	0.891935	0.524897	0.570247	0.370565	0.254047
1.09133	0.541332	0.564964	0.625015	0.368934	0.266489
1.09658	1.29204	0.540457	0.48608	0.320265	0.2479
0.994615	0.493192	0.494745	0.481954	0.337592	0.237386
0.894759	3.18724	0.445018	0.535853	0.349059	0.0811502
2.09162	0.578769	0.551693	0.520805	0.342888	0.131086
1.0936	1.0898	0.592026	0.47666	0.381172	0.0912498
1.01987	0.781584	0.508931	0.757082	0.36268	0.249446
0.891907	1.13545	0.519897	0.451659	0.365569	0.242843
0.610757	0.998215	0.457016	0.531189	0.346557	0.43025
1.27869	1.06963	0.419843	0.518967	0.352161	0.158487
0.647651	1.21522	0.301389	0.382617	0.363973	0.242421
1.0513	0.74611	0.551728	0.503691	0.296085	0.256017
0.812575	1.48268	0.605482	1.02465	0.343625	0.267211
1.25673	0.864845	0.554279	0.552917	0.320028	0.25972
3.78208	1.01589	0.499163	0.456143	0.367147	0.190883
1.10057	1.064	0.631914	0.465058	0.367406	0.261706
0.908914	1.47374	0.511197	0.640546	0.351264	0.067329
0.686864	0.754705	0.487495	0.596104	0.332403	0.11345
1.01669	0.739556	0.522422	0.584158	0.374587	0.207249
1.32454	1.97324	0.626833	0.615153	0.328779	0.256385
0.852357	0.529004	0.580495	0.541745	0.334087	0.264335
0.910788	0.266426	0.54592	0.564088	0.301204	0.261293
1.12692	1.04261	0.525066	0.518799	0.390593	0.269378
3.8251	1.08072	0.471517	0.620998	0.462248	0.240024
1.19686	1.12067	0.40317	0.565401	0.32182	0.357374
1.04454	1.16283		0.584616	0.348037	0.235467
0.713462	1.07449		0.43053	0.354486	0.24484
0.918071	1.06461		0.57125	0.349859	0.26092
0.987152	0.77869		0.475489	0.283424	0.249537
3.72894	3.37689		0.531605	0.493586	0.0585342
1.17279	0.360974		0.520493	0.334922	0.0862932
1.18937	0.685647		0.58584	0.347353	0.245473
1.02427	1.37407		0.521914	0.389084	0.270641
1.15431	2.53124		0.587286	0.322214	0.261666
1.04829	0.982866		0.604462	0.348441	0.268188
0.805972	1.06658		0.537123	0.363332	0.250496
0.813796	0.994021		0.554374	0.298142	0.244882
1.13492	0.735259		0.546774	0.341078	0.264485
1.22421	1.74977		0.557168	0.347251	0.205981
1.06447	0.498424		0.452155	0.350586	0.278157
1.22554	0.896753		0.573827	0.352694	0.239967
1.17548	1.60074		0.558999	0.373052	0.201674
1.24595	1.16706		0.593498	0.352285	0.0602046
1.07918	0.782975		0.535446	0.386258	0.131497
0.851837	0.791876		0.505855	0.315012	0.155949
0.947532	3.479		0.569645	0.394345	0.267178
1.13442	0.976271		0.606244	0.328224	0.276171
1.0497	0.656016		0.582339	0.340566	0.308116
3.69092	0.586531		0.48045	0.53087	0.242126
0.992879	1.10442		0.739408	0.317854	0.200321
1.20882	1.17717		0.547512	0.357375	0.24192
1.09424	1.09365		0.564349	0.357516	0.224675
1.26045	1.02033			0.326773	0.254048
0.814728	1.06998			0.24796	0.193312
0.928294	0.796507			0.338435	0.178901
0.949906	0.89911			0.329628	0.0859726
1.07418	0.732909			0.346981	0.176971
1.1737	0.760682			0.364084	0.250638
1.75768	1.6504			0.38114	0.206825
0.995706	1.20733			0.315756	0.254731
1.12855	0.838561			0.331724	0.25598
1.17237	0.719118			0.333554	0.230262
0.840329	1.45266			0.360086	0.198731
0.83509	0.735028			0.313861	0.205823
1.15063	1.37227			0.322153	0.209087
1.2031	0.65411			0.324006	0.209744
1.06997	0.91085			0.350985	0.0678726
1.19205	1.14615			0.304805	0.128613
1.3694	0.952228			0.347735	0.217838
1.18933	1.09127			0.339036	0.250638
1.19616	1.06766			0.339891	0.259947
0.766344	1.01135			0.466522	0.254188
0.900049	0.914585			0.351175	0.283135
1.16909	1.29442			0.341793	0.317899
1.16113	0.538431			0.359813	0.272936
1.06942	1.05368			0.341718	0.261719
1.0991	1.13008			0.349629	0.25539
1.42891	0.886579			0.444001	0.260055
1.45246	0.965308			0.287192	0.2619
1.10333	1.02134			0.256708	0.0677699
0.952817	0.877089			0.612779	0.126041
1.21178	1.5145			0.292325	0.250001
1.04863	0.647108			0.369241	0.243931
1.18665				0.337324	0.300411
1.08368				0.319164	0.255265
1.80602				0.318587	0.256327
1.08952				0.329493	0.223252
1.06631				0.354679	0.21764
1.10302				0.632842	0.22582
				0.291011	0.191394
				0.346724	0.156778
				0.33879	0.177524
				0.283297	0.0992506
				0.361705	0.199047
				0.314479	0.243981
				0.33171	0.260825
				0.568632	0.256125
				0.281255	0.258562
				0.325138	0.269419
				0.378091	0.255311
				0.288788	0.28092
				0.376342	0.244209
				0.341912	0.219836
				0.489467	0.230103
				0.37825	0.0606892
				0.307138	0.147245
				0.352795	0.243528
				0.346935	0.201238
				0.294353	0.270956
				0.495045	0.258627
				0.351333	0.236415
				0.344788	0.267702
				0.350356	0.242143
				0.341381	0.312461
				0.348583	0.273691
				0.309573	0.228207
				0.281179	0.194014
				0.333262	0.122
				0.357979	0.237902
				0.412978	0.264856
				0.362637	0.252643
				0.315984	0.261967
				0.354971	0.262111
				0.342184	0.265905
				0.367955	0.272276
				0.401577	0.259168
				0.321508	0.197657
				0.312585	0.185976
				0.485401	0.0738374
				0.341116	0.139156
				0.3353	0.212504
				0.36444	0.272989
				0.277306	0.26807
				0.288993	0.267304
				0.742677	0.348783
				0.308282	0.240278
				0.347115	0.277493
				0.320092	0.259651
				0.367289	0.27905
				0.321154	0.289408
				0.260474	0.271957
				0.317473	0.0630568
				0.384908	0.105927
				0.32458	0.276692
				0.97717	0.226403
				0.281518	0.255456
				0.341413	0.264229
				0.325679	0.257715
				0.356853	0.266778
				0.315694	0.274755
				0.297411	0.257712
				0.316602	0.239293
				0.956457	0.25424
				0.306769	0.238107
				0.322431	0.06337
				0.310759	0.154489
					0.190617
					0.257782
					0.265744
					0.265918
					0.259173
					0.263679
					0.281954
					0.261933
					0.269791
					0.249977
					0.236568
					0.0470995
