# Supplementary material for: Macroscopic control of cell electrophysiology through ion channel expression
Source: eLife. 2022 Nov 9;11:e78075. doi: 10.7554/eLife.78075 (PMC9711524; doi:10.7554/eLife.78075)
Supplement: Figure 2—source data 1. [file elife-78075-fig2-data1.xlsx]

## Sheet: Panel H
2h square	2h sine	1h square	1h sine	0.5h square	0.5h sine
1.47403	1.13196	0.752564	0.661496	0.237593	0.321138
1.52594	1.19402	0.897523	0.703022	0.305559	0.32378
1.52839	1.23958	0.904958	0.747953	0.306192	0.324447
1.58148	1.40298	0.947059	0.796826	0.319085	0.363932
1.61564	1.42872	0.961095	0.812773	0.361571	0.36454
1.66478	1.43309	0.962153	0.819136	0.362155	0.366357
1.66683	1.43921	0.962289	0.830193	0.370539	0.37219
1.6784	1.44978	0.963722	0.841314	0.374098	0.404107
1.70354	1.47614	0.964872	0.843245	0.3885	0.405202
1.71729	1.51526	0.966643	0.851326	0.390411	0.433142
1.72546	1.58444	0.967207	0.881639	0.440344	0.434857
1.72859	1.63851	0.967612	0.885734	0.440798	0.434901
1.74873	1.65391	0.967684	0.88889	0.442879	0.438264
1.75079	1.7354	0.968408	0.891945	0.446369	0.44001
1.75148	1.75025	0.968961	0.89289	0.446721	0.44026
1.75786	1.75246	0.969022	0.899068	0.446833	0.440716
1.7632	1.75889	0.969627	0.899094	0.451221	0.44081
1.76378	1.76229	0.970018	0.91411	0.452566	0.440916
1.7675	1.77291	0.970218	0.916038	0.460682	0.441094
1.76969	1.7737	0.970226	0.925576	0.489105	0.441126
1.77019	1.77764	0.970436	0.930499	0.498713	0.441385
1.77451	1.78037	0.970692	0.943704	0.504346	0.441418
1.77537	1.78063	0.971123	0.946619	0.505006	0.441571
1.77872	1.78282	0.971611	0.950205	0.505611	0.442299
1.78305	1.78927	0.971888	0.950335	0.513446	0.443599
1.78354	1.79087	0.972055	0.952164	0.519825	0.443751
1.78844	1.79541	0.972955	0.95517	0.522694	0.443863
1.78982	1.79833	0.973151	0.957729	0.523062	0.444005
1.8257	1.80625	0.97339	0.958909	0.529096	0.444405
1.82945	1.81666	0.973458	0.959959	0.530461	0.44454
1.83114	1.81773	0.973593	0.960343	0.540757	0.444913
1.83246	1.82649	0.974338	0.961348	0.54952	0.444963
1.83802	1.82828	0.974347	0.962377	0.572904	0.444976
1.83813	1.83044	0.97452	0.962459	0.574281	0.444977
1.84316	1.88524	0.974521	0.962508	0.576156	0.445196
1.86495	1.88909	0.975197	0.962592	0.576475	0.445209
1.87353	1.89275	0.975636	0.964158	0.576632	0.445496
1.87711	1.91289	0.976204	0.964475	0.579718	0.445514
1.8777	1.91733	0.976347	0.965307	0.583529	0.445566
1.87853	1.91816	0.976844	0.965554	0.583791	0.445566
1.89074	1.92012	0.977322	0.965945	0.586868	0.445611
1.89133	1.92289	0.977527	0.966992	0.587727	0.445727
1.89505	1.92382	0.977888	0.967602	0.588171	0.445843
1.89506	1.92447	0.978241	0.967644	0.588966	0.445875
1.89909	1.92538	0.978252	0.968228	0.589159	0.44595
1.90579	1.92751	0.978263	0.968332	0.590811	0.44613
1.91079	1.93068	0.978991	0.968807	0.591339	0.446182
1.9127	1.93334	0.979077	0.969279	0.591612	0.446268
1.91491	1.9378	0.979105	0.969354	0.592144	0.446389
1.91808	1.93818	0.979315	0.969423	0.592391	0.446463
1.92067	1.93964	0.979329	0.970051	0.592596	0.446641
1.92238	1.94271	0.979348	0.970709	0.592843	0.446694
1.92255	1.94294	0.979813	0.971715	0.593261	0.446753
1.92275	1.94379	0.980142	0.971885	0.593547	0.446769
1.92384	1.94382	0.980451	0.97238	0.594133	0.446814
1.92469	1.94442	0.980793	0.972558	0.594261	0.446933
1.92756	1.94653	0.982652	0.972773	0.594358	0.446953
1.93022	1.94731	0.984209	0.972819	0.595053	0.447253
1.93074	1.94733	0.984776	0.973218	0.595178	0.447307
1.93129	1.94768	0.985527	0.975338	0.59542	0.447345
1.9316	1.94941	0.985532	0.975416	0.595537	0.447398
1.93189	1.94942	0.986437	0.975444	0.595968	0.447402
1.93255	1.94999	0.987602	0.975773	0.59601	0.447476
1.93296	1.95053	0.988158	0.976202	0.596344	0.447527
1.93308	1.95297	0.988468	0.977071	0.596392	0.447592
1.93317	1.95355	0.988524	0.977308	0.596414	0.447647
1.93393	1.95459	0.989625	0.977337	0.596429	0.447701
1.93613	1.95583	0.99337	0.977668	0.596694	0.447715
1.93767	1.95673	0.996064	0.978124	0.596735	0.447805
1.9378	1.95683	0.996511	0.97865	0.596756	0.447806
1.93863	1.95764	1.0012	0.978667	0.596883	0.44789
1.93921	1.95764	1.03547	0.979203	0.597054	0.447928
1.93963	1.95798	1.04593	0.979962	0.59737	0.447946
1.93979	1.95877	1.04854	0.981698	0.597372	0.448023
1.94044	1.95917	1.05031	0.981819	0.597487	0.448132
1.94046	1.95953	1.05069	0.982044	0.597756	0.448223
1.9414	1.95988	1.052	0.982175	0.59799	0.44825
1.94188	1.9607	1.05203	0.982624	0.598002	0.448289
1.94253	1.96231	1.05462	0.983704	0.598976	0.448389
1.9431	1.96275	1.05519	0.985427	0.599006	0.448531
1.9431	1.96283	1.0555	0.986274	0.599191	0.448841
1.94314	1.96288	1.05567	0.988133	0.599272	0.448931
1.94361	1.96356	1.05586	0.988671	0.599788	0.448936
1.94458	1.96579	1.05612	0.99452	0.599946	0.448942
1.94537	1.96881	1.05627	0.994703	0.600154	0.448954
1.94549	1.97279	1.05657	1.03797	0.600301	0.448974
1.94788	1.9749	1.05672	1.04395	0.600851	0.448977
1.9482	1.97541	1.05677	1.04423	0.60137	0.448978
1.94821	1.97599	1.05679	1.04585	0.601859	0.449063
1.94825	1.9763	1.05804	1.04674	0.602051	0.449156
1.94839	1.97682	1.05807	1.04714	0.602126	0.449173
1.94881	1.97953	1.05861	1.04905	0.602166	0.449263
1.94906	1.97991	1.05912	1.04908	0.602745	0.449519
1.9492	1.98126	1.0593	1.04914	0.603056	0.449558
1.94981	1.98929	1.05946	1.04925	0.603803	0.449588
1.94991	1.99038	1.05949	1.04994	0.603894	0.449724
1.95177	1.99513	1.05957	1.05016	0.604024	0.44981
1.95247	1.99612	1.05964	1.05023	0.605223	0.449838
1.95275	1.99757	1.05969	1.05096	0.605265	0.44987
1.95287	1.99981	1.05979	1.05142	0.606199	0.450127
1.95372	2.0049	1.06026	1.05175	0.606254	0.450148
1.95384	2.00602	1.06041	1.05205	0.607076	0.450156
1.95388	2.00855	1.06073	1.05231	0.60716	0.450327
1.95426	2.00918	1.06079	1.05251	0.607395	0.450486
1.95472	2.01398	1.0608	1.05257	0.607793	0.450607
1.95532	2.01717	1.06083	1.05267	0.608872	0.450647
1.95629	2.07082	1.06083	1.05287	0.609193	0.450692
1.95755	2.07142	1.06097	1.05328	0.611299	0.450765
1.95847	2.10263	1.06132	1.05377	0.611764	0.450771
1.95859	2.10298	1.06143	1.05548	0.613949	0.450817
1.95875	2.10309	1.06152	1.05557	0.62593	0.451081
1.95883	2.1049	1.06152	1.05568	0.626364	0.451451
1.95893	2.10711	1.06193	1.05575	0.651248	0.451471
1.95974	2.10718	1.06236	1.05583	0.657858	0.451586
1.95975	2.10806	1.06239	1.05589	0.662856	0.451727
1.96123	2.11294	1.06341	1.05606	0.663228	0.451759
1.96172	2.11334	1.06343	1.05608	0.664716	0.452109
1.9629	2.11486	1.06353	1.05613	0.665011	0.452128
1.96411	2.11496	1.06409	1.05682	0.665128	0.453231
1.96426	2.11744	1.06442	1.05747	0.665362	0.453595
1.96572	2.11942	1.06457	1.05752	0.667149	0.454254
1.96655	2.11997	1.06467	1.05838	0.667348	0.454741
1.96687	2.12009	1.06485	1.05879	0.66823	0.45516
1.96753	2.1205	1.0652	1.05884	0.669359	0.455654
1.9728	2.12098	1.0653	1.05902	0.670637	0.455755
1.97549	2.121	1.06574	1.05971	0.671252	0.455836
1.97614	2.12194	1.06574	1.05993	0.671593	0.457101
1.97692	2.12437	1.06583	1.06013	0.671676	0.457346
1.97773	2.12477	1.0668	1.06014	0.673047	0.458509
1.97813	2.12534	1.06701	1.06033	0.673445	0.461637
1.97864	2.12583	1.06744	1.06039	0.674505	0.462291
1.97993	2.12727	1.06744	1.06045	0.674729	0.465355
1.98966	2.12763	1.06814	1.06072	0.675615	0.46657
1.99048	2.12898	1.06878	1.0608	0.676018	0.466835
1.99631	2.13085	1.06898	1.06089	0.67605	0.467752
2.00003	2.13125	1.07026	1.06126	0.676146	0.46793
2.00601	2.13283	1.07121	1.06165	0.67621	0.46811
2.04097	2.13467	1.07246	1.06193	0.676311	0.469337
2.06275	2.13582	1.07269	1.06211	0.676356	0.47017
2.06446	2.13725	1.0742	1.06372	0.676545	0.470638
2.06639	2.13833	1.07518	1.06506	0.676829	0.470921
2.06795	2.14044	1.07665	1.06519	0.676849	0.471255
2.07719	2.14074	1.07763	1.06561	0.677175	0.471536
2.07775	2.14095	1.07873	1.06598	0.677288	0.471633
2.08053	2.14526	1.07898	1.06606	0.677291	0.472238
2.08088	2.14533	1.0792	1.06649	0.677425	0.472477
2.08109	2.14713	1.09454	1.06674	0.677743	0.473706
2.08375	2.14749	1.13127	1.06759	0.678105	0.474431
2.08891	2.14794	1.14351	1.06777	0.678133	0.477766
2.09323	2.149	1.1458	1.068	0.678175	0.515653
2.09478	2.14919	1.14766	1.06888	0.678787	0.516024
2.0959	2.14952	1.14924	1.07015	0.678823	0.518905
2.09612	2.15015	1.15236	1.07086	0.678893	0.519736
2.09635	2.15213	1.15268	1.07182	0.679051	0.521725
2.09712	2.15229	1.15521	1.07223	0.679064	0.522451
2.09742	2.15512	1.1563	1.07253	0.679349	0.52323
2.09786	2.16005	1.15993	1.08398	0.67947	0.523822
2.09818	2.16041	1.16299	1.08789	0.679551	0.524262
2.09869	2.16721	1.1806	1.11694	0.679566	0.525439
2.09957	2.16789	1.25865	1.12184	0.679617	0.525852
2.09985	2.17105	1.12329	1.13751	0.679663	0.526487
2.10025	2.17358		1.1378	0.679672	0.527766
2.10027	2.17412		1.14461	0.679839	0.527822
2.10031	2.17584		1.14507	0.679847	0.52789
2.10239	2.17684		1.14533	0.679905	0.52813
2.10324	2.17797		1.1474	0.679919	0.528542
2.10382	2.18397		1.1488	0.680026	0.528659
2.10407	2.18786		1.15025	0.680128	0.52877
2.10562	2.19002		1.15172	0.680184	0.528889
2.10563	2.19036		1.15274	0.680285	0.528916
2.10601	2.1904		1.1532	0.68031	0.528998
2.10603	2.22062		1.15437	0.680486	0.52917
2.10701	2.22114		1.15589	0.680636	0.52918
2.1071	2.22322		1.16255	0.680758	0.529209
2.10729	2.22867		1.16348	0.680826	0.529227
2.10801	2.24665		1.16901	0.680876	0.529301
2.10956	2.25273		1.17588	0.681004	0.529381
2.10972	2.27165		1.22703	0.681067	0.529481
2.10972	2.27253		1.24121	0.68108	0.529619
2.11197	2.2791		1.24518	0.681156	0.529621
2.1124	2.27943		1.24661	0.681262	0.52971
2.11307	2.2796		1.25464	0.681283	0.529862
2.11316	2.28123		1.19079	0.681365	0.529868
2.11409	2.29064		1.60691	0.681449	0.529949
2.1154	2.29122			0.681461	0.530161
2.11635	2.29262			0.68147	0.530167
2.1164	2.29506			0.681486	0.530189
2.11737	2.29726			0.68149	0.530348
2.11758	2.30028			0.681524	0.530372
2.11775	2.3024			0.681583	0.530375
2.12091	2.30319			0.681633	0.530376
2.12093	2.30387			0.681773	0.530413
2.12095	2.3083			0.681828	0.530443
2.12263	2.31181			0.681884	0.530532
2.12443	2.31253			0.681915	0.530535
2.12466	2.31335			0.681974	0.530608
2.1284	2.31481			0.682088	0.530704
2.12894	2.31711			0.682107	0.530739
2.13048	2.31794			0.682138	0.530771
2.13476	2.31839			0.682334	0.530781
2.13846	2.32666			0.682358	0.53082
2.14082	2.33351			0.682382	0.530824
2.14121	2.33708			0.682477	0.530884
2.14551	2.34292			0.682501	0.53101
2.14695	2.34358			0.682745	0.531097
2.1534	2.34423			0.682861	0.531365
2.15702	2.34483			0.682905	0.531521
2.15773	2.35057			0.682935	0.5316
2.1587	2.35667			0.683014	0.531638
2.16344	2.3691			0.683194	0.531766
2.164	2.37575			0.683291	0.531789
2.17018	2.38089			0.683454	0.531872
2.17179	2.48814			0.683472	0.531894
2.26588	2.49755			0.683592	0.53192
2.26749	2.5446			0.683622	0.532193
2.28023	2.74473			0.683796	0.532262
2.28564	2.78384			0.683994	0.532349
2.30098	2.86048			0.684007	0.532393
2.31106				0.684214	0.53247
2.33455				0.684334	0.532474
2.37229				0.684409	0.532482
2.42753				0.684421	0.53273
2.50454				0.68446	0.532757
				0.684523	0.532783
				0.684959	0.533144
				0.685381	0.533165
				0.685892	0.533185
				0.686225	0.533633
				0.686227	0.533684
				0.686622	0.533732
				0.686681	0.533796
				0.68708	0.533829
				0.687248	0.534031
				0.68747	0.534485
				0.687707	0.534515
				0.688055	0.53456
				0.688266	0.534595
				0.688654	0.534679
				0.688689	0.534709
				0.688704	0.535147
				0.688885	0.535187
				0.689272	0.535303
				0.689287	0.535375
				0.689361	0.535864
				0.689393	0.536009
				0.690044	0.536114
				0.69055	0.536287
				0.690612	0.536486
				0.690953	0.536674
				0.691233	0.53697
				0.691547	0.53699
				0.692182	0.537009
				0.692444	0.537651
				0.692464	0.53811
				0.693313	0.538273
				0.69337	0.538301
				0.693783	0.538339
				0.693784	0.538597
				0.694141	0.538815
				0.694838	0.53903
				0.696634	0.539042
				0.697233	0.539085
				0.69853	0.539109
				0.69868	0.539244
				0.698786	0.540572
				0.704082	0.541021
				0.707312	0.541111
				0.759908	0.541283
				0.7645	0.54145
				0.765785	0.541612
				0.767177	0.542878
				0.769732	0.543243
				0.769804	0.544256
				0.769886	0.545071
				0.769924	0.545609
				0.771202	0.545729
				0.774694	0.546112
				0.778943	0.546756
				0.866557	0.546896
					0.547212
					0.547343
					0.548167
					0.548516
					0.548823
					0.549091
					0.549235
					0.549264
					0.549609
					0.549832
					0.550157
					0.550366
					0.55043
					0.551043
					0.55148
					0.552526
					0.553186
					0.553813
					0.557146
					0.557242
					0.557352
					0.559836
					0.559838
					0.61982
					1.03718
					1.12325

## Sheet: Panel I
2h square	2h sine	1h square	1h sine	0.5h square	0.5h sine
0.969577	0.969494	0.985082	0.976959	0.951562	0.958333
0.96627	0.964286	0.981481	0.976959	0.949479	0.958333
0.96627	0.96131	0.981481	0.975806	0.949479	0.957265
0.962963	0.954613	0.977881	0.970046	0.949479	0.957265
0.960317	0.953869	0.973251	0.968126	0.949479	0.955128
0.959656	0.950893	0.973251	0.965438	0.948438	0.952991
0.957011	0.948661	0.971193	0.965438	0.948438	0.952991
0.955688	0.944196	0.971193	0.965054	0.948438	0.948718
0.953704	0.941964	0.96965	0.96467	0.947396	0.946581
0.953704	0.94122	0.96965	0.96467	0.947396	0.946581
0.95172	0.940476	0.968621	0.964286	0.941146	0.946581
0.951058	0.939732	0.968621	0.964286	0.938021	0.946581
0.951058	0.938988	0.967593	0.961214	0.936979	0.945513
0.951058	0.938244	0.960391	0.960445	0.936979	0.945513
0.94709	0.938244	0.959362	0.955453	0.935937	0.942308
0.944444	0.938244	0.95679	0.953149	0.935937	0.941239
0.944444	0.938244	0.954733	0.951229	0.935937	0.931624
0.944444	0.93378	0.950617	0.950845	0.935937	0.931624
0.944444	0.930804	0.950103	0.947389	0.933854	0.929487
0.943122	0.928571	0.94856	0.9447	0.930729	0.928419
0.933201	0.928571	0.946502	0.94278	0.929688	0.915598
0.925926	0.926339	0.937757	0.942396	0.928646	0.901709
0.916667	0.924107	0.924897	0.94086	0.928646	0.900641
0.916667	0.920387	0.92284	0.93702	0.927604	0.885684
0.916667	0.908482	0.917181	0.934716	0.927604	0.744658
0.916667	0.905506	0.88323	0.932412	0.922396	0.763889
0.87963	0.90253	0.816152	0.928955	0.922396
0.87037	0.889881		0.925883	0.921354
			0.925115	0.921354
			0.916283	0.919271
			0.877496	0.916146
				0.916146
				0.915104
				0.913021
				0.913021
				0.908854
				0.899479
				0.888021
				0.879687
				0.878646
