# Supplementary material for: Macroscopic control of cell electrophysiology through ion channel expression
Source: eLife. 2022 Nov 9;11:e78075. doi: 10.7554/eLife.78075 (PMC9711524; doi:10.7554/eLife.78075)
Supplement: Figure 3—figure supplement 1—source data 1. [file elife-78075-fig3-figsupp1-data1.xlsx]

## Sheet: Panel F
3h	2h	1h
1.88464	1.52392	0.662822
1.09022	1.61037	0.732247
1.19374	1.61182	0.801478
1.41683	1.61981	0.809255
1.69889	1.62373	0.879872
1.85104	1.62673	0.880923
1.89896	1.62911	0.881239
1.9911	1.63328	0.881919
2.01499	1.63653	0.882577
2.03413	1.63756	0.884032
2.10498	1.64485	0.887015
2.11816	1.69372	0.887525
2.12903	1.70146	0.889034
2.1865	1.70484	0.889306
2.20087	1.7117	0.889468
2.29784	1.73506	0.889695
2.33429	1.75051	0.890883
2.46101	1.77149	0.891661
2.4708	1.77323	0.894148
2.49885	1.77323	0.89514
2.50483	1.77476	0.895752
2.50809	1.77578	0.895842
2.54484	1.77913	0.896279
2.54741	1.77924	0.896282
2.54963	1.78341	0.89806
2.56122	1.78671	0.898069
2.58233	1.78687	0.898231
2.59395	1.78735	0.898319
2.59725	1.78739	0.899315
2.63322	1.78865	0.899625
2.63765	1.79006	0.899636
2.66711	1.7902	0.899644
2.66944	1.79225	0.900688
2.68239	1.79558	0.90093
2.68448	1.79623	0.900979
2.68496	1.79658	0.901514
2.68584	1.79662	0.901839
2.69496	1.79672	0.901966
2.71102	1.79719	0.90314
2.72509	1.79857	0.903471
2.72785	1.79947	0.904401
2.73639	1.79999	0.904929
2.73792	1.80007	0.909048
2.73963	1.80048	0.912654
2.75112	1.80094	0.916367
2.77056	1.80158	0.934067
2.77172	1.80299	0.968906
2.79081	1.80327	1.03001
2.80467	1.80395	1.03683
2.82663	1.80474	1.03896
2.83464	1.80741	1.03934
2.84426	1.80811	1.03966
2.8459	1.80851	1.0426
2.84877	1.80935	1.04853
2.86362	1.81167	1.04873
2.86595	1.81274	1.04892
2.87456	1.81315	1.04902
2.87975	1.81531	1.04968
2.88164	1.82511	1.04979
2.88296	1.82697	1.05047
2.88314	1.82836	1.05176
2.89196	1.84543	1.05233
2.90333	1.84996	1.05323
2.90516	1.85134	1.05448
2.90899	1.85228	1.05586
2.91515	1.85476	1.05624
2.93281	1.85539	1.05648
2.9445	1.85547	1.05706
2.96488	1.85551	1.05726
2.96893	1.85555	1.05766
2.9961	1.856	1.05803
3.02721	1.85631	1.05851
3.02853	1.85659	1.05862
3.02992	1.8573	1.05872
3.03563	1.85736	1.05872
3.04335	1.85863	1.05943
3.04351	1.85875	1.06057
3.06007	1.85882	1.06091
3.06056	1.85944	1.06122
3.06919	1.85958	1.06131
3.0936	1.86053	1.06147
3.10009	1.8619	1.0635
3.10803	1.86192	1.06362
3.17078	1.86235	1.06446
3.18826	1.86276	1.06449
3.20006	1.86283	1.06514
3.20447	1.86325	1.0653
3.21334	1.86355	1.0654
3.21609	1.86393	1.06567
3.22649	1.86435	1.06606
3.23429	1.86665	1.06655
3.2699	1.8674	1.06659
3.27934	1.86955	1.06678
3.2829	1.87386	1.0671
3.28805	1.89213	1.06713
3.29003	1.89366	1.06741
3.2959	1.89771	1.06753
3.30187	1.9027	1.06784
3.46342	1.90364	1.06791
3.46464	1.90479	1.068
3.50097	1.9075	1.06805
3.6361	1.90989	1.06819
3.65037	1.91033	1.06829
3.69598	1.91037	1.06899
3.76557	1.91071	1.06899
3.82714	1.91132	1.06935
3.85445	1.91133	1.06938
4.2589	1.91247	1.07055
3.45967	1.91286	1.07057
3.53915	1.91474	1.07079
	1.91577	1.07213
	1.91577	1.07214
	1.91596	1.07309
	1.91685	1.07337
	1.91724	1.07363
	1.91774	1.07386
	1.91912	1.07413
	1.92032	1.0742
	1.92365	1.07454
	1.92486	1.07647
	1.92494	1.07658
	1.92642	1.07785
	1.92729	1.07805
	1.92753	1.07816
	1.92813	1.07832
	1.92843	1.07837
	1.92972	1.08623
	1.93019	1.08624
	1.9303	1.08713
	1.93036	1.08802
	1.93137	1.08865
	1.93177	1.08997
	1.93209	1.222
	1.93215	1.22287
	1.93231	1.23197
	1.93233	1.23467
	1.93278	1.23493
	1.93309	1.23735
	1.93319	1.23838
	1.93336	1.24312
	1.9335	1.24515
	1.93372	1.24927
	1.93431	1.24941
	1.93434	1.27442
	1.93445	1.44094
	1.93448
	1.9345
	1.93505
	1.9354
	1.93547
	1.93554
	1.93569
	1.93618
	1.93626
	1.93656
	1.9368
	1.93701
	1.93747
	1.93844
	1.93847
	1.93858
	1.93869
	1.93873
	1.93883
	1.93913
	1.93928
	1.93949
	1.93949
	1.93951
	1.93954
	1.93974
	1.93978
	1.9398
	1.93982
	1.93983
	1.94005
	1.94018
	1.94037
	1.94038
	1.94053
	1.94063
	1.94067
	1.94067
	1.94069
	1.94077
	1.94085
	1.941
	1.94106
	1.94115
	1.94125
	1.94132
	1.94133
	1.94199
	1.94199
	1.94203
	1.94208
	1.94212
	1.94213
	1.94213
	1.94218
	1.94221
	1.94222
	1.94229
	1.94231
	1.94234
	1.94238
	1.94238
	1.94267
	1.94275
	1.9428
	1.94303
	1.9432
	1.94322
	1.94325
	1.94336
	1.94348
	1.94352
	1.94359
	1.94365
	1.94392
	1.94404
	1.94404
	1.94409
	1.94428
	1.94435
	1.94436
	1.94442
	1.94446
	1.94452
	1.94453
	1.94453
	1.94457
	1.94459
	1.94464
	1.94466
	1.94486
	1.94496
	1.94497
	1.94503
	1.94507
	1.94517
	1.94524
	1.94526
	1.94529
	1.9453
	1.94533
	1.94542
	1.94543
	1.94544
	1.94553
	1.94555
	1.94565
	1.94569
	1.94571
	1.94571
	1.94575
	1.94584
	1.94591
	1.94595
	1.94598
	1.94603
	1.94608
	1.94614
	1.94623
	1.94625
	1.94627
	1.94647
	1.9465
	1.9465
	1.94655
	1.94669
	1.9467
	1.94674
	1.94678
	1.94692
	1.94695
	1.94708
	1.94709
	1.94713
	1.94716
	1.94717
	1.94729
	1.9473
	1.94733
	1.94734
	1.94753
	1.94768
	1.94769
	1.94794
	1.94797
	1.94801
	1.94803
	1.94803
	1.94807
	1.94819
	1.94825
	1.94826
	1.94827
	1.94839
	1.94862
	1.94863
	1.94873
	1.94878
	1.94882
	1.94889
	1.94902
	1.94937
	1.94955
	1.94957
	1.94959
	1.94984
	1.94984
	1.94989
	1.95003
	1.95009
	1.95027
	1.95055
	1.95063
	1.95066
	1.95073
	1.95074
	1.95091
	1.95094
	1.95101
	1.95103
	1.95111
	1.95126
	1.95128
	1.95136
	1.95145
	1.95148
	1.95174
	1.95182
	1.95185
	1.95191
	1.95194
	1.95197
	1.95201
	1.95204
	1.95212
	1.95215
	1.95217
	1.95223
	1.95239
	1.95245
	1.9527
	1.95275
	1.95289
	1.9529
	1.95306
	1.95311
	1.95315
	1.95319
	1.9534
	1.95369
	1.9537
	1.95376
	1.95392
	1.954
	1.95402
	1.95403
	1.95405
	1.95431
	1.95433
	1.95433
	1.95435
	1.95437
	1.95446
	1.95447
	1.95473
	1.95491
	1.95497
	1.95507
	1.95532
	1.95539
	1.95543
	1.95551
	1.95557
	1.95557
	1.95559
	1.95567
	1.95568
	1.95594
	1.95616
	1.95634
	1.95639
	1.95656
	1.95693
	1.95699
	1.95702
	1.95711
	1.95719
	1.95739
	1.9577
	1.95777
	1.95792
	1.95797
	1.95829
	1.95876
	1.95905
	1.95918
	1.95934
	1.95935
	1.95936
	1.95951
	1.95967
	1.9597
	1.96018
	1.96085
	1.96093
	1.96094
	1.96109
	1.96109
	1.96136
	1.96143
	1.9618
	1.96191
	1.96208
	1.96241
	1.96292
	1.96406
	1.96423
	1.96435
	1.96493
	1.96495
	1.96527
	1.96701
	1.96733
	1.96781
	1.96795
	1.96926
	1.97178
	1.97226
	1.9738
	1.97381
	1.9739
	1.97393
	1.97457
	1.97489
	1.97516
	1.9756
	1.97685
	1.97707
	1.97723
	1.97727
	1.97754
	1.97791
	1.97793
	1.978
	1.97998
	1.98006
	1.98008
	1.98037
	1.98044
	1.98112
	1.98175
	1.98238
	1.98259
	1.98405
	1.98408
	1.98549
	1.98668
	1.98697
	1.9873
	1.98873
	1.98944
	2.01055
	2.0128
	2.01449
	2.0198
	2.02539
	2.02823
	2.02863
	2.03084
	2.03183
	2.03208
	2.0325
	2.03516
	2.03778
	2.04269
	2.05411
	2.06409
	2.06521
	2.06704
	2.07202
	2.07358
	2.07512
	2.07659
	2.07992
	2.081
	2.08365
	2.08549
	2.08558
	2.08707
	2.08751
	2.08776
	2.0883
	2.0896
	2.09085
	2.09103
	2.09201
	2.09248
	2.09462
	2.0948
	2.09531
	2.09579
	2.09731
	2.0976
	2.09796
	2.09829
	2.09943
	2.09951
	2.09973
	2.10029
	2.10032
	2.10046
	2.10061
	2.10108
	2.10158
	2.10186
	2.10187
	2.10188
	2.10206
	2.1022
	2.10235
	2.10239
	2.10274
	2.10313
	2.10323
	2.10382
	2.10387
	2.10401
	2.10457
	2.10489
	2.1052
	2.10537
	2.10539
	2.1057
	2.10577
	2.1059
	2.10606
	2.1061
	2.10613
	2.10621
	2.10624
	2.1064
	2.10644
	2.10657
	2.10694
	2.10714
	2.10731
	2.1074
	2.10743
	2.10746
	2.10752
	2.10753
	2.10758
	2.10761
	2.10799
	2.10831
	2.1086
	2.10863
	2.10897
	2.10906
	2.10914
	2.10932
	2.10939
	2.10946
	2.10977
	2.10987
	2.10997
	2.11033
	2.1104
	2.11043
	2.11056
	2.11057
	2.11059
	2.1106
	2.11071
	2.1108
	2.11094
	2.111
	2.11101
	2.11105
	2.11152
	2.11154
	2.11155
	2.11157
	2.11163
	2.11172
	2.11179
	2.11181
	2.11197
	2.11198
	2.112
	2.11204
	2.11209
	2.11209
	2.11216
	2.11216
	2.11222
	2.11233
	2.11244
	2.11251
	2.11257
	2.11262
	2.11263
	2.11266
	2.11278
	2.11282
	2.11291
	2.11293
	2.113
	2.11306
	2.11307
	2.11309
	2.11325
	2.11328
	2.11328
	2.11332
	2.11337
	2.11344
	2.11346
	2.11347
	2.1135
	2.11352
	2.11369
	2.11381
	2.11384
	2.11385
	2.11397
	2.11399
	2.114
	2.11406
	2.11407
	2.11425
	2.11428
	2.11431
	2.11433
	2.11444
	2.11445
	2.11456
	2.11458
	2.11461
	2.11461
	2.11467
	2.11468
	2.11469
	2.11471
	2.11482
	2.11485
	2.115
	2.11502
	2.1151
	2.11512
	2.11521
	2.11524
	2.11527
	2.1154
	2.1155
	2.1155
	2.11551
	2.11551
	2.11554
	2.11554
	2.11561
	2.11565
	2.11566
	2.11578
	2.11582
	2.11583
	2.11588
	2.11592
	2.11597
	2.11598
	2.11608
	2.11614
	2.11618
	2.1162
	2.1162
	2.11625
	2.11637
	2.11642
	2.11647
	2.11654
	2.11658
	2.11659
	2.11661
	2.11663
	2.11667
	2.11674
	2.11681
	2.11688
	2.11695
	2.11702
	2.11703
	2.11707
	2.11708
	2.11709
	2.11712
	2.11715
	2.11726
	2.11732
	2.11734
	2.11736
	2.11738
	2.11745
	2.1176
	2.11766
	2.11767
	2.11769
	2.1177
	2.11772
	2.11789
	2.11789
	2.11792
	2.11793
	2.11793
	2.11794
	2.11808
	2.11811
	2.11814
	2.11816
	2.11846
	2.11848
	2.11859
	2.11868
	2.11882
	2.11887
	2.11905
	2.11909
	2.11918
	2.11927
	2.11932
	2.11934
	2.11936
	2.11952
	2.11954
	2.11955
	2.11959
	2.11973
	2.11983
	2.11994
	2.11994
	2.12003
	2.12007
	2.12008
	2.12009
	2.1202
	2.12047
	2.12048
	2.12048
	2.12049
	2.12059
	2.12066
	2.12083
	2.12087
	2.12088
	2.12089
	2.12093
	2.12102
	2.12105
	2.12106
	2.12122
	2.12123
	2.12124
	2.12129
	2.12149
	2.12158
	2.12161
	2.12164
	2.12167
	2.12169
	2.12182
	2.12197
	2.12205
	2.12207
	2.12209
	2.1221
	2.12216
	2.12225
	2.1224
	2.12243
	2.12248
	2.12254
	2.12264
	2.1228
	2.12293
	2.12301
	2.12308
	2.12333
	2.12344
	2.12355
	2.1236
	2.12361
	2.12362
	2.12364
	2.12378
	2.12379
	2.12385
	2.12391
	2.12393
	2.12403
	2.12414
	2.12423
	2.12426
	2.12457
	2.12465
	2.1249
	2.12493
	2.12493
	2.12513
	2.12535
	2.12535
	2.12551
	2.12557
	2.12559
	2.12563
	2.12564
	2.12565
	2.12569
	2.12582
	2.12597
	2.12607
	2.12622
	2.12625
	2.12644
	2.12657
	2.12664
	2.1268
	2.12683
	2.12684
	2.12692
	2.12731
	2.12739
	2.12778
	2.12782
	2.12813
	2.12859
	2.12874
	2.12885
	2.12907
	2.12912
	2.12958
	2.12981
	2.1303
	2.13105
	2.13108
	2.13136
	2.13185
	2.13231
	2.13233
	2.13234
	2.13256
	2.13257
	2.13284
	2.13332
	2.13334
	2.1336
	2.13391
	2.13432
	2.13457
	2.1346
	2.13482
	2.13491
	2.13514
	2.13517
	2.13522
	2.13589
	2.13589
	2.13606
	2.1362
	2.13648
	2.13776
	2.1383
	2.13841
	2.13841
	2.1398
	2.14058
	2.14138
	2.14232
	2.14276
	2.14772
	2.14826
	2.15201
	2.15386
	2.1542
	2.1556
	2.16572
	2.17337
	2.19524
	2.1976
	2.19771
	2.19859
	2.20328
	2.24153
	2.26679
	2.27043
	2.27398
	2.27562
	2.2761
	2.27692
	2.27846
	2.27858
	2.28037
	2.28071
	2.28135
	2.28303
	2.28518
	2.28633
	2.28637
	2.2866
	2.28741
	2.28858
	2.28891
	2.2902
	2.29038
	2.29139
	2.2926
	2.29267
	2.29312
	2.29396
	2.29452
	2.29467
	2.29574
	2.29716
	2.29726
	2.29772
	2.29776
	2.29792
	2.29892
	2.29997
	2.30025
	2.30075
	2.30136
	2.30319
	2.30524
	2.30597
	2.30691
	2.31121
	2.31438
	2.32299
	2.32554
	2.33863
	2.47271
	2.47401
	2.47465
	2.47508
	2.48048
	2.48483

## Sheet: Panel G
3h	2h	1h
0.0777383	0.161406	0.239383
0.117614	0.17914	0.271008
0.192025	0.23407	0.364096
0.286394	0.26079	0.379591
0.337905	0.264755	0.395444
0.342978	0.273997	0.404217
0.371794	0.288707	0.423047
0.374885	0.290485	0.424973
0.37873	0.290677	0.442295
0.387691	0.290817	0.455574
0.393243	0.293316	0.46223
0.400479	0.303292	0.463333
0.408069	0.303407	0.464805
0.429094	0.31316	0.467492
0.431706	0.31398	0.467658
0.44318	0.315985	0.473041
0.447423	0.319325	0.489758
0.45151	0.323562	0.501498
0.467516	0.335453	0.504593
0.48632	0.355774	0.509481
0.510635	0.359395	0.515767
0.515392	0.359869	0.519052
0.518626	0.36005	0.520026
0.523597	0.362635	0.520118
0.536429	0.363416	0.549977
0.550533	0.363846	0.554379
0.554726	0.366279	0.55446
0.560444	0.366807	0.555603
0.562543	0.37083	0.561444
0.563842	0.371112	0.5646
0.567591	0.375384	0.570268
0.568468	0.37548	0.572225
0.570248	0.375872	0.576544
0.572955	0.378158	0.578428
0.57306	0.37982	0.579314
0.582051	0.380618	0.57978
0.590161	0.383261	0.583253
0.59618	0.386191	0.584646
0.600938	0.391347	0.585885
0.605021	0.395742	0.58806
0.607516	0.401994	0.592773
0.609679	0.40589	0.594263
0.611442	0.406001	0.599858
0.61441	0.406651	0.602726
0.618199	0.407074	0.603364
0.626043	0.408975	0.603942
0.64172	0.4148	0.611307
0.671736	0.415832	0.611949
0.680125	0.416382	0.622625
0.685752	0.416474	0.630797
0.692784	0.424355	0.636807
0.697591	0.426203	0.639549
0.704709	0.427279	0.642991
0.705775	0.427574	0.656383
0.709269	0.428285	0.663743
0.716651	0.428775	0.664496
0.717019	0.429319	0.667449
0.725008	0.430539	0.672084
0.728703	0.430771	0.677906
0.730386	0.432337	0.681766
0.735136	0.432388	0.685121
0.73566	0.433906	0.686378
0.743053	0.436472	0.694836
0.746991	0.438849	0.69995
0.752767	0.439698	0.70601
0.773283	0.439892	0.714902
0.776938	0.440869	0.717637
0.784961	0.444177	0.718635
0.787354	0.444361	0.718636
0.791066	0.448161	0.727607
0.794153	0.449281	0.731205
0.809389	0.452093	0.734186
0.813746	0.453248	0.737384
0.825754	0.45367	0.750292
0.826215	0.453853	0.75197
0.826421	0.45445	0.760819
0.827174	0.45511	0.762179
0.83075	0.456748	0.767235
0.831918	0.460168	0.767686
0.840814	0.460664	0.768108
0.8423	0.46201	0.770613
0.844253	0.465726	0.778434
0.85231	0.466757	0.789698
0.856869	0.470308	0.790024
0.861776	0.470737	0.793046
0.864794	0.471381	0.802815
0.867727	0.472599	0.81247
0.873944	0.474292	0.813126
0.876533	0.474695	0.816534
0.892533	0.477949	0.821531
0.897884	0.477996	0.823493
0.902122	0.478874	0.825824
0.903051	0.479617	0.825955
0.909245	0.48018	0.839606
0.915973	0.480279	0.847815
0.92116	0.480454	0.84792
0.922137	0.481844	0.847944
0.940191	0.482161	0.854699
0.948536	0.482301	0.855231
0.950615	0.48254	0.855346
0.951327	0.48266	0.85703
0.951719	0.483556	0.866793
0.959061	0.483572	0.870771
0.966353	0.484207	0.872047
0.971929	0.484968	0.873623
0.980833	0.485647	0.876266
0.987224	0.485966	0.878408
0.991023	0.486712	0.882691
0.993345	0.487104	0.883103
0.994421	0.488624	0.885736
0.999586	0.489241	0.889253
1	0.49067	0.889357
1	0.494434	0.890282
1	0.495251	0.891082
1	0.496394	0.893252
1	0.496816	0.895308
1	0.498859	0.899647
1	0.500148	0.906907
1	0.500753	0.912667
1	0.501546	0.915983
1	0.502584	0.921532
1	0.503007	0.922579
1	0.504367	0.930616
1	0.504505	0.937467
1	0.504642	0.93846
1	0.504722	0.943414
1	0.505075	0.948787
1	0.505587	0.957532
1	0.506079	0.95998
1	0.506449	0.96012
1	0.507054	0.962169
1	0.508509	0.966242
1	0.512661	0.967746
1	0.513484	0.971488
1	0.514133	0.971569
1	0.514849	0.973672
1	0.515263	0.977015
	0.515508	0.980002
	0.516016	0.982338
	0.516361	0.985763
	0.516963	0.988073
	0.517059	0.990262
	0.517628	0.990595
	0.518486	0.995911
	0.519156	0.997963
	0.519768	1
	0.520603	1
	0.520792	1
	0.521152	1
	0.521868	1
	0.522069	1
	0.523208	1
	0.523288	1
	0.523595	1
	0.523694	1
	0.523703	1
	0.523917	1
	0.524474	1
	0.526795	1
	0.527589	1
	0.528399	1
	0.529034	1
	0.529664	1
	0.530152	1
	0.531183	1
	0.533247	1
	0.534462	1
	0.534713	1
	0.536021	1
	0.536124	1
	0.537218	1
	0.537293	1
	0.539402	1
	0.539839	1
	0.541429
	0.542899
	0.543124
	0.544128
	0.544597
	0.54466
	0.545054
	0.546286
	0.547344
	0.547404
	0.54763
	0.547921
	0.548098
	0.551815
	0.55201
	0.554377
	0.554802
	0.555445
	0.557984
	0.559092
	0.56004
	0.560091
	0.560178
	0.560524
	0.562109
	0.562713
	0.563359
	0.563673
	0.564752
	0.564888
	0.567198
	0.567391
	0.568075
	0.568541
	0.568657
	0.569207
	0.570316
	0.571133
	0.571337
	0.571954
	0.572298
	0.572416
	0.573213
	0.573423
	0.573511
	0.574555
	0.574897
	0.574939
	0.575712
	0.575789
	0.577104
	0.577363
	0.577944
	0.579116
	0.579384
	0.581052
	0.581266
	0.581753
	0.581775
	0.58297
	0.583698
	0.585406
	0.585606
	0.587607
	0.58763
	0.587829
	0.58813
	0.588149
	0.589061
	0.589156
	0.589181
	0.589319
	0.589721
	0.589751
	0.589892
	0.591022
	0.591729
	0.591804
	0.592873
	0.593281
	0.593807
	0.594355
	0.594878
	0.594977
	0.595243
	0.596118
	0.596564
	0.596625
	0.597492
	0.597537
	0.598323
	0.598529
	0.598591
	0.599345
	0.601006
	0.601098
	0.601104
	0.602008
	0.602078
	0.602309
	0.602716
	0.602722
	0.604049
	0.60426
	0.604481
	0.604655
	0.606612
	0.607703
	0.607751
	0.608369
	0.608943
	0.609107
	0.609535
	0.610564
	0.610738
	0.610846
	0.611171
	0.611357
	0.61189
	0.612752
	0.612948
	0.613719
	0.614267
	0.616476
	0.616983
	0.617046
	0.618863
	0.619618
	0.619644
	0.61979
	0.621936
	0.622061
	0.622083
	0.6223
	0.622867
	0.625738
	0.625747
	0.626395
	0.626471
	0.627041
	0.627049
	0.627664
	0.627715
	0.628517
	0.628599
	0.628645
	0.629006
	0.629066
	0.629555
	0.629715
	0.629739
	0.629911
	0.630078
	0.630531
	0.630685
	0.630918
	0.631793
	0.63322
	0.634506
	0.634616
	0.635166
	0.635408
	0.635413
	0.635972
	0.636972
	0.637352
	0.63786
	0.638134
	0.638961
	0.639736
	0.639926
	0.640342
	0.640931
	0.64119
	0.64123
	0.641534
	0.641621
	0.642435
	0.642521
	0.642977
	0.64301
	0.643184
	0.643894
	0.644653
	0.644686
	0.644736
	0.644941
	0.644982
	0.645284
	0.645988
	0.646584
	0.646675
	0.646855
	0.648112
	0.648141
	0.64817
	0.64997
	0.650247
	0.650967
	0.650978
	0.651135
	0.652676
	0.652709
	0.654139
	0.654312
	0.654401
	0.65514
	0.655168
	0.655401
	0.655516
	0.656392
	0.656413
	0.656513
	0.656694
	0.657028
	0.657273
	0.657283
	0.657452
	0.657572
	0.658259
	0.658304
	0.658548
	0.658575
	0.659108
	0.659671
	0.659678
	0.66045
	0.660588
	0.661805
	0.662891
	0.66332
	0.66349
	0.663601
	0.663896
	0.664797
	0.665039
	0.665945
	0.666155
	0.666227
	0.666954
	0.667034
	0.667343
	0.667434
	0.667524
	0.667779
	0.667891
	0.66851
	0.668572
	0.669956
	0.670645
	0.670685
	0.670791
	0.670945
	0.671284
	0.671964
	0.673146
	0.673798
	0.673885
	0.674836
	0.675106
	0.675176
	0.675436
	0.676137
	0.676271
	0.676569
	0.676728
	0.677169
	0.677287
	0.677464
	0.678744
	0.678895
	0.679712
	0.679723
	0.679734
	0.679749
	0.679859
	0.679907
	0.679984
	0.680208
	0.680387
	0.680645
	0.680917
	0.681183
	0.68139
	0.681604
	0.681654
	0.681672
	0.682225
	0.68223
	0.6824
	0.682424
	0.683066
	0.683196
	0.683895
	0.684339
	0.686148
	0.686273
	0.6881
	0.688144
	0.688598
	0.688994
	0.689205
	0.689484
	0.689506
	0.689787
	0.689904
	0.690147
	0.690255
	0.691331
	0.692387
	0.692952
	0.69358
	0.6942
	0.695806
	0.695891
	0.696062
	0.697371
	0.69762
	0.697769
	0.698783
	0.699745
	0.700124
	0.701404
	0.701458
	0.70221
	0.703012
	0.703205
	0.703862
	0.704071
	0.704535
	0.704737
	0.704762
	0.704888
	0.705313
	0.705709
	0.706615
	0.708791
	0.70884
	0.708867
	0.709424
	0.709631
	0.709752
	0.710186
	0.711379
	0.711448
	0.711725
	0.712083
	0.712381
	0.71274
	0.713048
	0.713499
	0.714192
	0.714504
	0.714549
	0.716025
	0.716297
	0.716664
	0.717912
	0.719537
	0.721543
	0.722317
	0.722936
	0.723217
	0.723544
	0.723759
	0.724269
	0.724335
	0.724377
	0.725001
	0.725033
	0.725088
	0.725437
	0.725487
	0.726111
	0.72706
	0.727182
	0.727759
	0.727945
	0.729586
	0.729798
	0.730224
	0.730641
	0.730822
	0.731106
	0.731124
	0.731404
	0.731667
	0.731886
	0.732407
	0.73243
	0.732492
	0.732576
	0.733526
	0.733855
	0.73443
	0.734493
	0.735819
	0.736658
	0.736934
	0.737445
	0.737539
	0.738276
	0.739156
	0.740082
	0.740442
	0.74093
	0.741067
	0.742213
	0.74368
	0.743871
	0.743996
	0.744704
	0.744731
	0.745275
	0.745621
	0.747008
	0.747184
	0.747918
	0.748095
	0.748936
	0.749161
	0.749271
	0.749837
	0.751004
	0.751112
	0.751133
	0.751852
	0.752388
	0.753102
	0.753271
	0.753411
	0.753969
	0.754155
	0.754773
	0.75502
	0.756253
	0.756256
	0.756576
	0.756656
	0.756695
	0.757563
	0.758782
	0.759667
	0.760032
	0.760632
	0.76082
	0.76159
	0.761606
	0.76204
	0.762427
	0.762457
	0.762843
	0.763085
	0.76309
	0.763218
	0.763584
	0.76364
	0.765019
	0.765959
	0.766548
	0.767449
	0.767753
	0.768144
	0.769969
	0.769998
	0.770372
	0.770467
	0.772053
	0.772753
	0.773728
	0.774386
	0.77462
	0.774928
	0.775265
	0.775591
	0.776748
	0.77678
	0.77701
	0.779484
	0.77964
	0.780044
	0.780349
	0.780473
	0.780736
	0.782163
	0.782417
	0.78417
	0.78432
	0.784705
	0.784897
	0.785106
	0.785293
	0.78638
	0.786387
	0.787309
	0.787555
	0.787699
	0.788506
	0.788845
	0.789104
	0.790899
	0.791241
	0.791463
	0.793552
	0.794109
	0.794241
	0.795204
	0.795318
	0.796111
	0.796459
	0.797623
	0.798248
	0.798444
	0.799888
	0.800369
	0.800504
	0.801063
	0.802168
	0.803025
	0.803118
	0.803404
	0.803882
	0.804052
	0.804502
	0.80491
	0.805357
	0.806297
	0.806703
	0.807321
	0.808021
	0.809452
	0.809963
	0.810267
	0.810564
	0.81058
	0.810707
	0.811218
	0.812407
	0.813384
	0.814147
	0.814627
	0.815375
	0.815892
	0.816253
	0.81644
	0.816731
	0.817004
	0.818652
	0.818796
	0.820028
	0.820321
	0.820925
	0.821176
	0.821259
	0.821499
	0.822478
	0.823548
	0.823829
	0.824195
	0.824474
	0.825022
	0.825807
	0.825892
	0.826555
	0.827376
	0.827493
	0.827633
	0.827709
	0.829709
	0.829785
	0.830289
	0.831505
	0.831701
	0.833104
	0.833144
	0.834517
	0.835635
	0.83633
	0.836777
	0.837239
	0.83784
	0.840199
	0.840703
	0.842066
	0.843047
	0.843438
	0.843931
	0.844525
	0.844688
	0.845093
	0.846144
	0.846728
	0.84708
	0.847235
	0.847479
	0.847747
	0.848114
	0.848686
	0.849492
	0.850148
	0.850452
	0.850521
	0.850947
	0.852781
	0.853813
	0.854485
	0.855581
	0.855995
	0.856142
	0.856518
	0.858568
	0.858667
	0.859417
	0.859733
	0.860072
	0.860461
	0.860959
	0.862115
	0.862248
	0.863027
	0.863961
	0.864768
	0.865912
	0.866508
	0.866608
	0.867322
	0.867595
	0.867698
	0.869192
	0.869302
	0.87041
	0.870848
	0.871629
	0.87189
	0.872622
	0.87332
	0.874211
	0.875092
	0.876637
	0.877208
	0.877233
	0.878759
	0.878928
	0.879305
	0.879566
	0.879725
	0.879791
	0.880022
	0.88035
	0.880593
	0.882432
	0.882721
	0.883763
	0.884017
	0.884827
	0.885006
	0.885675
	0.886086
	0.88847
	0.88926
	0.889655
	0.891033
	0.892756
	0.893461
	0.89397
	0.894069
	0.895717
	0.895943
	0.897008
	0.897093
	0.897392
	0.897488
	0.897616
	0.898451
	0.898688
	0.898868
	0.898905
	0.89891
	0.898974
	0.89999
	0.900726
	0.901562
	0.902694
	0.903618
	0.906068
	0.906368
	0.907373
	0.907771
	0.910195
	0.911065
	0.912008
	0.912288
	0.912756
	0.914116
	0.91437
	0.915152
	0.9166
	0.917341
	0.91775
	0.920435
	0.920931
	0.922762
	0.923038
	0.923771
	0.923872
	0.925324
	0.92585
	0.927534
	0.928698
	0.929064
	0.929589
	0.932176
	0.93219
	0.935378
	0.93541
	0.935452
	0.93558
	0.93595
	0.936237
	0.936803
	0.937468
	0.938166
	0.939006
	0.940468
	0.941735
	0.943404
	0.943556
	0.945765
	0.948793
	0.94895
	0.950567
	0.952201
	0.952928
	0.954694
	0.955228
	0.956033
	0.957145
	0.957181
	0.958459
	0.958679
	0.95961
	0.959774
	0.960773
	0.96101
	0.96248
	0.963745
	0.963965
	0.96456
	0.964653
	0.965531
	0.965551
	0.965974
	0.966235
	0.967778
	0.969529
	0.970041
	0.971478
	0.972927
	0.974854
	0.975233
	0.976722
	0.97798
	0.977998
	0.978605
	0.979211
	0.983718
	0.984998
	0.986633
	0.991104
	0.991968
	0.992198
	0.992616
	0.993706
	0.994505
	0.995301
	0.998481
	1
	1
	1
	1
	1
	1
	1
	1
	1
	1
	1
	1
	1
	1
	1
	1
	1
	1
	1
	1
	1
	1
	1
	1
	1
	1
	1
	1
	1
	1
	1
	1
	1
	1
	1
	1
	1
	1
	1
	1
	1
	1
	1
	1
	1
	1
	1
	1
	1
	1
	1
	1
	1
	1
	1
	1

## Sheet: Panel H
3h	2h	1h
1.24568	1.09629	0.483304
1.70962	1.1174	0.40179
1.34083	1.02069	0.500313
1.49824	1.33667	0.481293
0.990533	0.902293	0.528675
0.988488	1.1315	0.508536
1.52151	0.995953	0.423579
2.4837	1.51108	0.462546
1.5438	0.997923	0.376647
0.853506	1.16952	0.753202
1.17657	1.11813	0.545159
1.12446	1.08358	0.423439
2.05164	0.959076	0.482192
1.09875	1.36422	0.358441
0.882578	0.936822	0.751218
1.35386	1.0376	0.615345
1.37876	0.788579	0.491595
1.37035	0.292041	0.453629
1.6909	1.06626	0.563832
0.562117	1.0877	0.428733
1.11116	1.1283	0.532415
1.758	1.13366	0.455155
1.44962	0.722509	0.466132
1.44015	1.31969	0.407325
0.592353	1.06568	0.511839
1.27854	1.07944	0.68944
1.55676	0.928305	0.583818
2.06671	1.66337	0.402872
1.25703	1.02615	0.522495
0.471546	0.971151	0.428215
1.3031	1.05921	0.529468
1.44399	1.14952	0.406271
1.87625	1.08129	0.398085
1.42934	1.07274	0.618722
0.690156	0.814802	0.485513
1.06372	0.979996	0.473242
1.55133	1.06588	0.582922
1.6276	0.999038	0.454256
1.25729	1.61925	0.577414
0.842378	0.632106	0.699669
1.3908	1.29375	0.474561
1.45947	1.01604	0.458427
1.94092	1.1264	0.585889
1.40394	0.9691	0.500489
0.616368	1.68026	0.675964
1.33877	1.11198	0.594106
1.58224	1.0399	0.416757
2.17629	1.05114	0.172413
0.815037	1.03321	0.60611
0.640476	1.00431	0.487937
1.44991	1.06562	0.613974
1.66746	0.852143	0.576794
1.33971	0.349082	0.426954
0.415993	1.08787	0.522573
0.415678	0.981847	0.604292
0.553718	1.1561	0.498762
1.05531	1.17556	0.65033
1.16631	0.686287	0.531054
1.49075	1.54338	0.51143
1.40752	1.06974	0.465348
0.569864	1.0942	0.622649
0.998384	0.934158	0.460744
1.17261	1.15866	0.524057
1.8268	1.0592	0.466642
1.15025	1.49428	0.695296
0.906344	0.981236	0.545411
1.57799	1.09239	0.424971
1.25905	1.11183	0.456849
2.42545	0.975011	0.444033
1.24232	0.893463	0.544223
0.414595	0.323943	0.45942
1.39954	1.03674	0.648642
1.63458	1.14156	0.646082
1.6943	1.09712	0.3406
1.93106	1.16682	1.56685
0.500025	0.773454	0.418368
0.825375	1.29257	0.464567
1.14082	1.11597	0.589916
1.49257	1.06338	0.57227
2.51836	1.39238	0.441324
0.423515	0.859967	0.572336
1.41753	1.10856	0.587343
1.31761	1.10498	0.492104
1.32387	1.09473	0.56546
2.17241	1.17735	0.667252
1.35506	1.05733	0.510181
1.50418	1.15635	0.550746
1.788	0.758718	0.442375
0.622957	0.380751	0.485735
0.721461	1.00027	0.52951
1.41179	1.04183	0.497569
1.42529	1.19008	0.636768
1.94707	1.08119	0.542562
1.76062	0.532482	1.43505
0.533823	1.60277	0.270068
1.5665	1.07846	0.510058
1.33329	1.06785	0.586082
1.38823	1.11864	0.494394
2.32143	1.06612	0.501313
0.71873	1.17977	0.463975
1.22539	1.12124	0.534873
1.28977	1.20604	0.608452
1.86548	1.02476	0.411908
0.286257	1.02831	0.476303
0.724136	0.981636	0.469027
0.744206	0.790601	0.620998
1.5588	0.303725	0.503749
1.47162	1.05251	0.568625
1.57642	1.10306	0.315882
0.445231	1.10696	0.343446
0.950654	1.15117	0.443037
0.667761	0.876212	0.57465
1.5572	1.12389	0.521432
1.16394	1.08009	0.403191
1.41287	1.10615	0.508836
0.657135	1.13919	0.661063
0.832419	1.07257	0.323016
1.97946	1.56708	0.657326
1.16212	1.12532	0.179004
1.56558	1.08428	0.411576
1.68688	1.04963	0.566216
0.285451	1.02351	0.487303
1.47904	1.08186	0.443095
1.38752	0.456769	0.67875
2.89994	0.284211	0.508863
1.05028	1.05749	0.474934
2.18879	1.06356	0.515091
0.631458	1.10608	0.476324
0.885287	1.12018	0.575652
2.33883	0.866211	0.431193
1.66027	1.04026	0.524797
0.733527	1.09584	0.435013
1.16304	1.06409	0.517051
1.44064	1.47784	0.459672
2.17936	1.10432	0.559642
1.69392	1.08901	0.426491
0.588897	1.06348	0.340506
	1.09688	0.569015
	1.08959	0.535099
	1.12281	0.437789
	1.09238	0.357596
	0.624042	0.62726
	0.402761	0.37355
	0.961765	0.528383
	1.03246	0.584081
	1.10258	0.584637
	1.17675	0.496945
	0.959949	0.551655
	1.08421	0.489923
	1.04082	0.471035
	1.30493	0.59009
	1.11994	0.400124
	1.09407	0.404188
	1.18158	0.596953
	1.07257	0.508364
	1.06714	0.513716
	1.11773	0.564104
	1.05478	0.549181
	1.10533	0.631626
	0.671975	0.426895
	0.422745	0.579161
	0.948959	0.500296
	1.07075	0.47879
	1.0856	0.494372
	1.1744	0.536144
	0.961868	0.459219
	1.16466	0.54434
	1.06277	0.339082
	1.11553	0.581731
	1.10754	0.522903
	1.025	0.568265
	1.05879	0.444411
	1.29164	0.574993
	1.09977	0.446799
	1.0908
	1.09622
	1.10656
	0.760294
	0.408054
	0.96433
	1.11079
	1.06697
	1.08524
	0.882864
	1.06973
	1.06009
	1.09724
	0.980413
	1.51446
	1.08308
	1.06912
	1.02811
	1.13263
	1.11189
	1.1114
	0.729366
	0.253846
	1.09454
	1.14907
	1.13286
	1.0885
	0.85112
	1.02151
	1.05469
	1.13186
	0.994008
	1.73606
	1.00933
	1.06372
	1.07603
	1.07254
	1.13863
	1.06224
	0.731435
	0.407376
	1.04499
	1.08358
	1.11011
	1.14882
	0.904501
	1.06559
	1.06118
	0.990874
	1.13272
	1.13665
	1.10785
	1.11004
	1.11093
	1.13179
	1.11461
	1.088
	0.886096
	0.405997
	1.09442
	1.07748
	1.1289
	1.10672
	0.914094
	1.12016
	1.05282
	1.17477
	1.03771
	1.13593
	1.01164
	1.10007
	1.08717
	1.11796
	1.08168
	1.02158
	0.973619
	0.346866
	0.999002
	1.32319
	1.04048
	1.10446
	0.822137
	1.16209
	1.00906
	1.18844
	1.11747
	1.10495
	1.07325
	1.09807
	1.04743
	0.999982
	1.12913
	1.11282
	0.945383
	0.47639
	1.06927
	1.04058
	1.03634
	0.987997
	0.830364
	1.05449
	1.02538
	1.05208
	1.00514
	1.0097
	1.5537
	1.07661
	1.03586
	1.10935
	1.08333
	1.09223
	0.704781
	0.351256
	1.08872
	1.09785
	1.08063
	1.14674
	1.00972
	1.06518
	1.19146
	1.1623
	1.15048
	1.02885
	1.10636
	1.1524
	1.03485
	1.27714
	1.01486
	0.990078
	0.90804
	0.176111
	1.06369
	1.26675
	1.04454
	1.18906
	0.925145
	1.20094
	1.09563
	1.05089
	1.18357
	1.09776
	1.0768
	1.10958
	1.15932
	1.07937
	1.09706
	1.08956
	0.839107
	0.358856
	1.08645
	1.11755
	1.14222
	1.13722
	0.960787
	1.13858
	1.08277
	1.19359
	1.10507
	1.0931
	0.974507
	1.11246
	1.20019
	1.08428
	0.999735
	1.02348
	0.990502
	0.267077
	1.09025
	1.14122
	0.975736
	1.40665
	0.853515
	1.11452
	1.12013
	1.10314
	1.06835
	1.27499
	1.0608
	1.10219
	1.04976
	0.900558
	0.993431
	0.95062
	1.02067
	0.372258
	1.09641
	1.0648
	1.11029
	1.10344
	0.90735
	1.22396
	1.09959
	1.11804
	1.08907
	1.04567
	1.11373
	1.08504
	1.06372
	1.13791
	1.13304
	0.97775
	0.871418
	0.262646
	1.08476
	1.05445
	1.11261
	1.25049
	0.88355
	1.13076
	1.11411
	1.07924
	1.09158
	1.10901
	1.26642
	1.06664
	1.1209
	1.10535
	1.11079
	1.11234
	0.774303
	0.411894
	0.892632
	1.09155
	1.12545
	1.14377
	0.916663
	1.00222
	1.07043
	1.14457
	1.1115
	1.07572
	1.48726
	1.04683
	1.07768
	1.04876
	1.11306
	1.12613
	0.67375
	0.397941
	1.12378
	0.993218
	1.02393
	1.26928
	0.87894
	1.28692
	0.920658
	1.10211
	1.01064
	1.10216
	1.08769
	1.06846
	1.0488
	1.48925
	1.07032
	1.02389
	0.725025
	0.333253
	1.11286
	1.06221
	1.04469
	1.29884
	1.06138
	1.07154
	1.05691
	1.07161
	1.07112
	0.993007
	1.27561
	1.06347
	1.09039
	1.026
	1.17047
	1.09442
	0.840953
	0.282901
	1.10149
	1.10554
	1.04376
	1.2788
	0.890862
	1.22264
	1.04864
	1.0637
	1.19666
	1.05038
	1.14343
	1.04552
	1.21263
	1.05038
	1.27835
	1.04329
	0.736079
	0.398084
	1.03603
	1.11838
	1.09301
	1.166
	0.941899
	1.07545
	1.14602
	1.10421
	1.10017
	1.11157
	1.09758
	1.08364
	1.04496
	1.4185
	0.975252
	1.00984
	0.856201
	0.350792
	1.0937
	1.06891
	1.05721
	1.32997
	1.00218
	0.998393
	1.09893
	1.08876
	1.0678
	1.02935
	1.07337
	1.11935
	1.03239
	1.09726
	1.1979
	1.07748
	0.850092
	0.215903
	1.08464
	1.11115
	1.08387
	1.2309
	0.984488
	1.01481
	1.40326
	1.03404
	0.965862
	1.356
	1.01343
	1.07956
	1.09843
	1.05797
	0.987929
	1.1354
	0.864753
	0.407262
	1.00526
	1.15134
	1.11635
	1.04609
	0.869785
	1.08797
	1.1245
	0.91074
	1.07782
	1.14611
	1.07024
	1.03229
	1.12497
	1.0827
	1.01132
	1.09197
	0.956742
	0.476248
	0.918457
	1.06315
	1.03171
	1.06386
	0.936405
	1.10126
	1.08877
	1.09764
	1.10287
	1.07993
	1.11346
	1.09238
	1.1188
	1.08944
	1.10893
	1.13788
	0.79072
	0.289873
	1.09054
	1.0733
	1.12537
	1.07003
	0.927501
	1.10062
	1.10186
	1.00747
	1.07159
	1.54718
	1.11572
	1.0801
	1.0967
	0.976586
	1.08083
	1.08438
	0.476824
	0.335824
	0.997685
	1.02512
	0.982527
	1.23756
	0.955357
	1.14262
	1.08742
	0.994569
	1.4356
	1.11773
	1.02664
	1.04232
	1.07814
	1.0183
	1.24189
	1.06296
	0.731786
	0.291796
	1.08914
	1.11845
	1.15311
	1.10619
	0.781717
	1.4605
	1.05872
	1.1121
	1.01107
	1.07292
	0.982232
	1.21661
	1.0875
	1.09309
	1.02355
	0.958334
	0.924969
	0.37196
	0.954009
	1.056
	1.07793
	1.16745
	0.918652
	1.04861
	1.4298
	1.06445
	1.11863
	1.06186
	1.07807
	1.05934
	1.08761
	1.08647
	1.08177
	1.14599
	0.749997
	0.599356
	0.719402
	0.880239
	1.02554
	1.01191
	0.935689
	1.0549
	1.05414
	1.05663
	1.02164
	1.11074
	1.07327
	1.06459
	1.08284
	1.10696
	1.13632
	1.1217
	0.788963
	0.463585
	0.940606
	1.03215
	1.0127
	1.10325
	0.919163
	1.11364
	1.06459
	1.11952
	1.14812
	1.11325
	1.09917
	1.17514
	1.09332
	1.11218
	1.10478
	1.03989
	0.78596
	0.330116
	0.931265
	1.05608
	1.10066
	1.13239
	0.963794
	0.996754
	1.07971
	1.41847
	1.05907
	1.03059
	1.10549
	1.12385
	1.10006
	1.06722
	1.03018
	1.10286
	0.812094
	0.450826
	0.765536
	0.9791
	1.09202
	1.18763
	0.933546
	1.14393
	1.05499
	1.09812
	1.12719
	1.11634
	1.14121
	1.08785
	1.07857
	1.04608
	1.06123
	1.04726
	0.847144
	0.34185
	1.07189
	1.20048
	1.07226
	1.17455
	0.880271
	1.37969
	0.905404
	1.10487
	1.06374
	1.32159
	1.24589
	0.848876
	1.10039
	0.997427
	0.995984
	1.13041
	0.921994
	0.180045
	1.13506
	1.04527
	1.1136
	1.4097
	0.786602
	1.3094
	0.962412
	1.08022
	1.03077
	1.10187
	1.31134
	1.04159
	1.0851
	1.11609
	1.12336
	0.987585
	0.859314
	0.550424
	0.876557
	0.914783
	1.0409
	1.10125
	1.08093
	1.1224
	1.10338
	1.08681
	1.11247
	1.0417
	1.2012
	1.09341
	1.10154
	1.11394
	1.067
	1.09052
	0.764896
	0.550349
	0.926806
	0.929356
	1.01951
	1.14643
	1.04877
	1.07059
	1.09192
	1.09143
	1.022
	1.03354
	1.11466
	1.09865
	1.18112
	1.13021
	1.06308
	1.10607
	0.736839
	0.469052
	0.975827
	1.01427
	1.08245
	1.12652
	1.05138
	1.15389
	1.05287
	1.06997
	1.25952
	1.12071
	1.06344
	1.09871
	1.04788
	1.14692
	1.06329
	1.09072
	0.775143
	0.401091
	1.02533
	1.09217
	1.10496
	1.08592
	1.05422
	1.10505
	1.14835
	1.10504
	0.954378
	1.13756
	1.3714
	0.993335
	1.0865
	1.02508
	1.20234
	1.11221
	0.699511
	0.526497
	0.960103
	1.02104
	1.06641
	1.02906
	1.06987
	1.03115
	1.11172
	0.988286
	1.1906
	1.07229
	1.0504
	1.07366
	0.982143
	1.50715
	0.989651
	1.0757
	0.654583
	0.606034
	0.790123
	0.885975
	0.976339
	1.09246
	1.02957
	0.996542
	0.991087
	1.07399
	1.04917
	1.08638
	1.03454
	1.07049
	1.11546
	0.997131
	1.07369
	1.03628
	0.851052
	0.363357
	1.04225
	1.02467
	1.0983
	1.11464
	1.03941
	1.13154
	1.11225
	1.00621
	1.18519
	0.992089
	1.35307
	1.06996
	1.08961
	1.12012
	1.04654
	1.04244
	0.877062
	0.362868
	1.01797
	1.07281
	1.14748
	1.12146
	1.07863
	1.12549
	1.08787
	1.24814
	1.08658
	1.10221
	1.11205
	1.10611
	1.01835
	1.09398
	1.18439
	1.13019
	0.797471
	0.309871
	1.10289
	1.08229
	1.12491
	1.10133
	1.06621
	1.08228
	1.11747
	1.02319
	1.22225
	1.10787
	1.11422
	1.10862
	1.09827
	1.0967
	1.14327
	1.01648
	0.874814
	0.667134
	0.760333
	1.00979
	1.15814
	1.10807
	1.06321
	1.16693
	1.00136
	1.25587
	1.02642
	1.07053
	1.06211
	1.39615
	1.02117
	1.04366
	1.03031
	1.01225
	0.908755
	0.322438
	1.03404
	1.14268
	1.13822
	1.07005
	0.95245
	1.15848
	1.11543
	1.18663
	1.1228
	1.13066
	1.12454
	1.11556
	1.05216
	1.05186
	1.07156
	1.00548
	0.921863
	0.429742
	0.946725
	1.1669
	1.06943
	1.07213
	1.00474
	1.05098
	1.28728
	1.05154
	0.897711
	1.50472
	1.06307
	1.06824
	1.07901
	1.10331
	1.05982
	1.15248
	0.757681
	0.221195
	1.06772
	1.05975
	1.23592
	1.03183
	0.888293
	1.32682
	1.1358
	1.31455
	0.995316
	1.12229
	1.09846
	1.06729
	1.00601
	1.116
	1.03847
	1.0331
	0.817599
	0.389858
	0.977619
	1.06993
	1.14423
	0.861118
	1.06981
	1.06783
	1.2039
	1.11366
	1.07998
	1.16285
	1.10554
	1.11148
	1.13229
	1.06972
	1.0179
	0.969285
	0.843947
	0.45926
	0.952567
	1.04402
	1.11616
	0.99897
	0.97543
	1.2341
	1.11491
	1.13242
	1.10171
	1.07182
	1.06594
	1.09863
	0.961648
	1.25638
	1.05981
	0.932665
	0.930283
