# Supplementary material for: Macroscopic control of cell electrophysiology through ion channel expression
Source: eLife. 2022 Nov 9;11:e78075. doi: 10.7554/eLife.78075 (PMC9711524; doi:10.7554/eLife.78075)
Supplement: Figure 3—figure supplement 2—source data 1. [file elife-78075-fig3-figsupp2-data1.xlsx]

## Sheet: Panel B
peak amplitudes (a.u.)
0.139864
0.194636
0.206064
0.206475
0.226727
0.244876
0.251454
0.25172
0.261521
0.265045
0.271769
0.278455
0.280721
0.282458
0.29392
0.30307
0.308504
0.311602
0.317284
0.323795
0.3254
0.330868
0.335404
0.335553
0.337975
0.339089
0.339229
0.339714
0.340915
0.342677
0.347577
0.349058
0.352107
0.358825
0.364157
0.364928
0.373459
0.377379
0.379183
0.380127
0.381838
0.384184
0.385704
0.386621
0.39363
0.394255
0.397686
0.402557
0.404446
0.406132
0.409422
0.410333
0.410841
0.411038
0.412156
0.412414
0.416309
0.416982
0.417551
0.418526
0.425325
0.425781
0.426957
0.428676
0.430488
0.432137
0.432546
0.436348
0.436834
0.438865
0.439834
0.44136
0.44145
0.442161
0.446494
0.447254
0.447499
0.449559
0.450274
0.451281
0.455792
0.457353
0.458313
0.458642
0.46319
0.46498
0.465164
0.466094
0.466627
0.467221
0.46777
0.469285
0.469297
0.4699
0.470059
0.470933
0.471092
0.472452
0.472714
0.473536
0.475317
0.475949
0.47601
0.476093
0.476687
0.476911
0.477169
0.477974
0.480104
0.484378
0.484449
0.484729
0.485152
0.487836
0.487915
0.488787
0.490328
0.490468
0.490858
0.491736
0.492889
0.493898
0.4948
0.495063
0.496179
0.500555
0.502441
0.503577
0.504875
0.507031
0.507935
0.507991
0.509552
0.509932
0.510574
0.510605
0.511026
0.513165
0.514262
0.514445
0.515383
0.515557
0.516067
0.516899
0.518423
0.518527
0.520355
0.521323
0.521686
0.522056
0.523993
0.524558
0.525166
0.526173
0.526293
0.526429
0.530304
0.533227
0.533432
0.534076
0.538219
0.542016
0.542123
0.544976
0.544978
0.545205
0.545358
0.545672
0.545687
0.546721
0.547777
0.548136
0.549483
0.549932
0.550155
0.551002
0.551614
0.553303
0.553419
0.553564
0.555248
0.555334
0.555574
0.556367
0.55677
0.556875
0.558804
0.558875
0.558885
0.559244
0.560059
0.561089
0.561447
0.562319
0.563658
0.563684
0.564546
0.564716
0.565404
0.566318
0.567328
0.568016
0.5691
0.569915
0.570186
0.5705
0.570518
0.570836
0.57086
0.571131
0.572158
0.573339
0.573675
0.574319
0.577434
0.579149
0.57962
0.580819
0.581543
0.582063
0.582249
0.582323
0.582807
0.583486
0.583655
0.583801
0.584491
0.584885
0.588238
0.588423
0.588767
0.589911
0.590833
0.591003
0.5926
0.592634
0.594671
0.595317
0.595775
0.596226
0.596385
0.596406
0.597435
0.59899
0.599033
0.599073
0.599343
0.599683
0.599797
0.600315
0.603405
0.604082
0.604094
0.6042
0.604385
0.605697
0.605814
0.606649
0.607343
0.60884
0.610172
0.610548
0.610975
0.61127
0.611392
0.612085
0.612196
0.612767
0.613437
0.613564
0.613638
0.613871
0.614455
0.614587
0.615039
0.615189
0.617234
0.621574
0.621647
0.622125
0.622416
0.623491
0.623819
0.625448
0.62672
0.626843
0.627535
0.627636
0.628075
0.628358
0.628522
0.62881
0.629368
0.6297
0.630667
0.632562
0.63476
0.634892
0.635056
0.635229
0.636401
0.637234
0.637744
0.640034
0.64261
0.645584
0.646117
0.646126
0.646155
0.646616
0.646685
0.646703
0.646803
0.647108
0.647335
0.648591
0.649805
0.65182
0.651912
0.651939
0.652088
0.652779
0.654862
0.6564
0.656665
0.657194
0.657967
0.658583
0.658866
0.659597
0.660299
0.661114
0.661805
0.662204
0.662815
0.662824
0.663739
0.663796
0.663833
0.664404
0.664811
0.666331
0.666776
0.668104
0.668204
0.670003
0.672028
0.672261
0.672425
0.672447
0.672929
0.673026
0.673372
0.674188
0.677152
0.677294
0.677466
0.677944
0.678062
0.678174
0.680036
0.681994
0.68406
0.685546
0.685698
0.686912
0.687827
0.687992
0.68812
0.688487
0.69104
0.692296
0.69326
0.693387
0.693526
0.696067
0.696121
0.696847
0.696911
0.700562
0.700902
0.70159
0.702073
0.70226
0.702492
0.702971
0.70302
0.703771
0.703993
0.705544
0.706095
0.706473
0.707016
0.708164
0.708906
0.709061
0.709076
0.709463
0.712148
0.712604
0.713375
0.713582
0.714206
0.716926
0.718747
0.720114
0.720117
0.720399
0.722834
0.723245
0.723701
0.723864
0.724318
0.7244
0.724484
0.724596
0.724774
0.725581
0.729205
0.730842
0.731055
0.732011
0.733669
0.733736
0.735912
0.737109
0.737544
0.73902
0.739138
0.739184
0.740587
0.740634
0.740715
0.742172
0.742199
0.743024
0.74361
0.743934
0.746331
0.746627
0.7472
0.747905
0.748602
0.748916
0.750304
0.750676
0.751229
0.751479
0.751504
0.752514
0.753382
0.753896
0.753918
0.754358
0.755142
0.755979
0.756806
0.757246
0.758215
0.759753
0.760384
0.761117
0.76178
0.762303
0.763434
0.766366
0.76745
0.768887
0.769304
0.769677
0.770446
0.770684
0.772123
0.772753
0.774627
0.775262
0.775732
0.7758
0.775822
0.775971
0.776482
0.777403
0.779473
0.779629
0.782379
0.782963
0.784744
0.785955
0.786204
0.786518
0.787132
0.787491
0.7878
0.788035
0.78888
0.788885
0.789407
0.789448
0.789683
0.790127
0.791561
0.791685
0.792039
0.792207
0.7932
0.793832
0.794096
0.794258
0.794294
0.795421
0.797477
0.797872
0.799942
0.800293
0.801603
0.801656
0.802609
0.803201
0.803519
0.8036
0.804674
0.806538
0.808612
0.80886
0.809095
0.809352
0.811564
0.811595
0.811673
0.812577
0.81314
0.813327
0.813388
0.813753
0.814164
0.814393
0.814691
0.815759
0.8158
0.81673
0.81716
0.817672
0.817741
0.817991
0.818021
0.819313
0.819587
0.820807
0.82192
0.822928
0.82332
0.82336
0.823434
0.823568
0.823818
0.825792
0.826548
0.827983
0.827986
0.828889
0.829363
0.829712
0.830595
0.831047
0.831107
0.83176
0.83223
0.833998
0.835494
0.835888
0.836264
0.839306
0.839837
0.841753
0.842583
0.842708
0.842888
0.844473
0.845333
0.845688
0.845972
0.846983
0.847158
0.847439
0.850369
0.852749
0.853052
0.853553
0.85431
0.8547
0.857659
0.8586
0.860467
0.861286
0.861397
0.861913
0.862165
0.862477
0.862775
0.863849
0.863961
0.864666
0.867105
0.868129
0.868955
0.870059
0.870473
0.871476
0.871616
0.873933
0.874218
0.874339
0.877058
0.877606
0.878371
0.881001
0.881495
0.884251
0.88533
0.885506
0.885595
0.886734
0.887547
0.890128
0.891075
0.893878
0.895357
0.895526
0.896134
0.897522
0.897833
0.900722
0.901238
0.90212
0.902704
0.90347
0.903807
0.904448
0.904838
0.905386
0.906004
0.913265
0.919633
0.920208
0.921884
0.922136
0.9235
0.924307
0.926217
0.928604
0.929351
0.930126
0.931358
0.932625
0.93394
0.93424
0.934954
0.93705
0.937624
0.938151
0.939048
0.939116
0.939208
0.940117
0.94052
0.941147
0.943351
0.946535
0.947314
0.949952
0.952158
0.952226
0.952412
0.954403
0.955407
0.958047
0.960505
0.961937
0.964169
0.966111
0.967237
0.967516
0.975906
0.980026
0.982171
0.985969
0.990552
0.991238
0.994687
0.996556
1
1
1
1
1
1
1
1
1
1
1
1
1
1
1
1
1
1
1
1
1
1
1
1
1
1
1
1
1
1
1
1
1
1
1
1
1

## Sheet: Panel C
periods(h)
0.861283
1.04164
1.19859
1.19985
1.34896
1.35841
1.36018
1.3606
1.36409
1.36627
1.50813
1.53527
1.53686
1.53837
1.53915
1.53927
1.53976
1.5408
1.54105
1.54123
1.54272
1.54646
1.55082
1.55113
1.55164
1.63891
1.71206
1.71288
1.71445
1.77564
1.77825
1.78178
1.79693
1.81709
1.88123
1.89452
1.90522
1.90597
1.90643
1.90816
1.90973
1.91004
1.91312
1.91374
1.91475
1.9174
1.91958
1.9201
1.92146
1.92177
1.922
1.92224
1.92327
1.92331
1.92382
1.92576
1.92582
1.92608
1.92652
1.92698
1.92762
1.92767
1.92784
1.92857
1.92903
1.92926
1.92955
1.93006
1.93055
1.9306
1.93124
1.93157
1.93169
1.93223
1.93226
1.93304
1.93308
1.93323
1.93396
1.9345
1.93502
1.93511
1.93517
1.9352
1.93551
1.93561
1.93561
1.93563
1.93573
1.93576
1.9359
1.93632
1.93637
1.93639
1.93644
1.93649
1.9365
1.93675
1.93692
1.93694
1.93696
1.93702
1.93714
1.93715
1.93718
1.9372
1.93731
1.93747
1.93762
1.93765
1.93765
1.93784
1.93792
1.93795
1.938
1.93801
1.93808
1.93817
1.93845
1.93859
1.93865
1.93866
1.93872
1.93884
1.93885
1.93891
1.93899
1.93909
1.93925
1.93926
1.93927
1.93942
1.93945
1.93952
1.93964
1.93964
1.93964
1.93966
1.93977
1.9398
1.93987
1.93994
1.93994
1.93998
1.94012
1.94014
1.94027
1.94036
1.94037
1.94038
1.94042
1.94043
1.94046
1.94052
1.94063
1.94064
1.94069
1.94075
1.94088
1.94093
1.94103
1.94105
1.94106
1.94106
1.94108
1.94111
1.94119
1.9412
1.94122
1.94127
1.94129
1.94134
1.94138
1.94143
1.9416
1.94165
1.94174
1.94175
1.94181
1.94186
1.94195
1.9421
1.94219
1.9422
1.94221
1.94225
1.94225
1.94226
1.94228
1.94232
1.94234
1.94236
1.94237
1.94241
1.9425
1.94253
1.94256
1.94261
1.94283
1.94285
1.94285
1.94289
1.94291
1.94291
1.94299
1.94309
1.9431
1.94332
1.94339
1.94343
1.94344
1.94365
1.94367
1.9437
1.94375
1.94379
1.94384
1.94387
1.94389
1.94395
1.94397
1.944
1.94403
1.94434
1.94439
1.94455
1.94455
1.94462
1.94465
1.94469
1.94481
1.94483
1.94495
1.94506
1.9451
1.94515
1.94528
1.94538
1.94562
1.94566
1.94578
1.94591
1.94597
1.94599
1.94604
1.94604
1.94638
1.94641
1.94644
1.94653
1.94667
1.94672
1.94674
1.9468
1.94681
1.94689
1.94689
1.94696
1.94697
1.94725
1.94733
1.94739
1.94739
1.94761
1.94764
1.94765
1.94768
1.94769
1.94772
1.94782
1.94797
1.94815
1.94825
1.94839
1.9484
1.94857
1.94872
1.94886
1.94894
1.94921
1.94922
1.94936
1.94947
1.94964
1.95019
1.95029
1.95053
1.9511
1.95118
1.95186
1.95351
1.95539
1.95547
1.95659
1.95664
1.95699
1.95768
1.95797
1.95959
1.95973
1.95993
1.96005
1.9602
1.96118
1.96122
1.9623
1.96327
1.96417
1.9649
1.96884
1.96996
1.96999
1.97105
1.97192
1.97465
1.97718
1.97748
1.97973
1.98063
1.98077
1.98113
1.98179
1.98225
1.98275
1.98423
1.98437
1.98474
1.9862
1.98625
1.98723
1.98794
1.9899
1.99445
1.99476
1.9954
1.9967
2.0497
2.06186
2.0642
2.07687
2.07784
2.08244
2.08413
2.086
2.0867
2.08728
2.08953
2.09131
2.09132
2.09153
2.09176
2.09181
2.09206
2.09298
2.0933
2.09391
2.09495
2.09662
2.09866
2.09889
2.0989
2.09942
2.09946
2.09966
2.09983
2.10043
2.1005
2.10066
2.10138
2.10139
2.10152
2.10153
2.10165
2.10167
2.10186
2.10195
2.10206
2.1021
2.10228
2.10232
2.1024
2.10266
2.10286
2.10287
2.10333
2.10334
2.10335
2.10368
2.10376
2.10391
2.10393
2.10402
2.10405
2.10407
2.10417
2.10423
2.10444
2.10445
2.10447
2.10447
2.10453
2.10455
2.10458
2.10462
2.10473
2.10475
2.10488
2.10498
2.10502
2.10506
2.10517
2.10548
2.10566
2.10569
2.10575
2.10579
2.10584
2.10584
2.10605
2.10611
2.10617
2.10625
2.10628
2.10636
2.10642
2.10644
2.10646
2.10647
2.10653
2.10658
2.10658
2.1066
2.10678
2.10698
2.107
2.10705
2.10721
2.10724
2.1073
2.10733
2.10741
2.10747
2.10747
2.10749
2.10754
2.10757
2.10759
2.10763
2.10774
2.10781
2.10782
2.10785
2.10791
2.10794
2.10807
2.10808
2.10808
2.10812
2.10814
2.10827
2.10827
2.10834
2.10835
2.10837
2.10837
2.10847
2.10865
2.10867
2.10881
2.10882
2.10883
2.10886
2.10891
2.10898
2.10905
2.1091
2.10916
2.10921
2.10924
2.10925
2.10925
2.10926
2.10926
2.10932
2.10938
2.10939
2.1094
2.1094
2.10943
2.10947
2.10949
2.1095
2.1095
2.1095
2.10958
2.10968
2.10983
2.10988
2.1099
2.11
2.11001
2.11003
2.1101
2.11016
2.11019
2.11025
2.11026
2.11035
2.1104
2.11047
2.11056
2.1106
2.11066
2.11076
2.11079
2.1108
2.11084
2.11085
2.11085
2.11089
2.11089
2.11092
2.11093
2.11101
2.11106
2.1111
2.11111
2.11121
2.11138
2.11139
2.11145
2.1115
2.11162
2.11164
2.11169
2.1119
2.11194
2.11197
2.11208
2.11213
2.1122
2.11221
2.11222
2.11231
2.11232
2.11235
2.11237
2.11237
2.11242
2.11244
2.11245
2.11248
2.11252
2.11252
2.11254
2.1126
2.11262
2.1128
2.11287
2.11291
2.11294
2.11297
2.11315
2.11326
2.11329
2.11329
2.11334
2.11337
2.11347
2.11361
2.11361
2.11394
2.11394
2.11407
2.11422
2.11432
2.11436
2.11443
2.11446
2.11474
2.11475
2.11476
2.11477
2.11489
2.11489
2.11505
2.11506
2.11508
2.11518
2.11533
2.11535
2.11561
2.1157
2.11596
2.11601
2.11604
2.11604
2.11613
2.11637
2.11642
2.11658
2.11662
2.11672
2.11685
2.11692
2.11699
2.11701
2.11733
2.11753
2.11755
2.11769
2.11776
2.11777
2.11785
2.11791
2.11792
2.11813
2.11813
2.1182
2.11828
2.1183
2.11872
2.11891
2.11917
2.11941
2.11987
2.11996
2.12008
2.12017
2.1202
2.12032
2.12048
2.1207
2.12133
2.12161
2.12171
2.12199
2.12216
2.12234
2.12307
2.12324
2.12329
2.12469
2.12486
2.12529
2.12551
2.12571
2.12621
2.12716
2.12736
2.12846
2.12872
2.12998
2.13003
2.13112
2.13167
2.1321
2.13254
2.13327
2.13381
2.13563
2.13644
2.13831
2.14008
2.15658
2.15993
2.16571
2.17999
2.27404
2.27741
2.27819
2.27906
2.28427
2.28771
2.28776
2.2883
2.29025
2.29025
2.29234
2.29417
2.29418
2.29589
2.29723
2.30755
2.31594
2.32232
2.327
2.35528
2.48555
2.62484

## Sheet: Panel D
peak widths (h)
0.275313
1.00766
1.14433
1.08588
1.08375
1.15577
1.13085
1.11875
1.11039
1.15851
1.12816
1.08082
1.13201
1.15154
1.10638
1.13827
1.11919
1.08782
1.13438
0.813109
0.263782
0.994891
1.13645
1.08192
1.12606
1.1415
1.12577
1.1459
1.14158
1.15498
1.08315
1.16975
1.1396
1.08445
1.13667
1.11931
1.14309
1.09016
1.11965
0.847405
0.211696
0.946739
1.11304
1.13563
1.09078
1.11657
1.14652
1.17291
1.10724
1.17877
1.07646
1.17214
1.25634
1.1379
1.13359
1.09979
1.12346
1.10366
1.05436
0.768563
1.01598
1.1233
1.14024
1.09656
1.18293
1.23284
1.18237
1.11277
1.12154
1.15666
1.18003
1.05831
1.37969
1.20542
1.16174
1.10514
1.09485
1.02757
0.801499
0.501588
0.845803
0.930968
1.13518
1.18436
1.11548
1.19612
1.05996
1.09488
1.06998
1.1623
1.11418
1.08437
1.09715
1.10065
1.15327
1.09931
1.21532
1.09938
0.895812
1.01689
1.10599
1.07493
1.18536
1.13282
1.13056
1.16474
1.1279
1.09186
1.14896
1.28461
1.09181
1.15104
1.11754
1.15272
1.14046
1.15154
1.0908
0.713361
0.229501
1.00994
1.07479
1.07657
1.13307
1.11711
1.13557
1.1136
1.08359
1.11061
1.11168
1.14313
1.18591
1.12963
1.3367
1.1123
1.11249
1.12509
1.13254
0.63501
0.419374
0.9965
0.980532
1.02742
1.1168
1.14356
1.12437
1.14842
1.11163
1.12654
1.12555
1.12776
1.12734
1.15019
1.15654
1.14624
1.14184
1.13493
1.11172
0.783125
1.06553
1.13908
1.1265
1.17515
1.10493
1.14763
1.04932
1.04821
1.16561
1.10843
1.04734
1.11399
1.11013
1.1293
1.23187
1.14223
1.10973
1.02189
0.838459
0.149912
1.11919
0.967821
1.16595
1.17317
1.1418
1.09894
1.13559
1.10578
1.12287
1.1763
1.10828
1.15898
1.15111
1.1339
1.06477
1.06158
1.1129
1.12574
0.852532
0.635677
0.751496
0.69568
1.03427
0.90996
1.16665
1.07175
0.999467
1.37172
1.12096
1.10889
1.07702
1.1058
1.07673
1.0259
0.999099
1.10166
1.13771
1.05136
0.982618
0.522941
0.727279
1.08387
0.970636
1.08425
1.07307
1.09173
1.32632
1.06195
1.10221
1.18798
1.11552
0.942637
1.12672
1.1178
1.05509
1.04165
1.14891
1.09461
0.972732
1.0486
1.35728
1.10841
1.0232
1.0867
1.15805
1.1295
1.30444
1.10462
1.15501
1.18938
1.11357
1.07224
1.12499
1.22929
1.12051
1.06516
0.951424
0.835856
0.41591
0.978054
1.22064
1.12374
1.04003
1.05743
1.00719
1.11287
1.12788
1.11686
1.1554
1.00801
1.10398
1.14323
0.973993
1.28521
1.11836
1.11514
1.03543
0.808729
1.11817
1.19866
1.07138
1.13878
1.10414
1.103
1.13453
1.12186
1.34902
1.12427
1.18336
1.11237
1.20411
1.11253
1.17016
1.16614
1.13846
1.12299
0.833179
1.121
1.04813
1.22864
1.10722
1.10841
1.11602
1.17278
1.18784
1.14052
1.15302
1.15608
1.11192
1.17518
1.17582
1.12647
1.12416
1.05865
1.09921
0.867574
1.101
1.09942
1.17633
1.0736
1.10098
1.09011
1.15157
1.12244
1.10578
1.13329
1.31882
1.0815
1.11114
1.14505
1.10004
1.12788
1.13073
1.11254
0.905076
0.132762
1.02257
1.14455
1.10963
1.13092
1.15798
1.13908
1.15257
1.11027
1.13938
1.1571
1.11163
1.17853
1.13527
1.14692
1.08964
1.17773
1.1328
1.03925
0.785099
0.263204
1.01198
1.0663
1.11354
1.1275
1.11674
1.0921
1.12041
1.09473
1.13301
1.11264
1.12826
1.2158
1.13094
1.15731
1.08106
1.32044
1.0923
1.13257
0.73678
0.196495
1.00561
1.11066
1.1344
1.10125
1.12151
1.11085
1.10274
1.22437
1.11995
1.14763
1.10611
1.16364
1.10661
1.08732
1.30315
1.08682
1.09761
1.09115
0.767815
0.321409
0.992523
1.10844
1.04724
1.0989
1.17004
1.16869
1.11204
1.11965
1.09
1.1539
1.17286
1.13649
1.15778
1.10623
1.20426
1.11742
1.14288
1.1589
0.809999
1.09171
1.13153
1.0912
1.1084
1.14999
1.10562
1.1198
1.15844
1.15386
1.08115
1.10405
1.42526
1.13938
1.10414
1.11301
1.14307
1.11086
0.989604
0.849557
0.40351
0.955591
1.1061
1.07808
1.12232
1.07991
1.0833
1.14815
1.1465
1.14215
1.08522
1.14172
1.15836
1.09753
1.10615
1.09333
1.0924
1.09733
1.07019
0.821673
1.10104
1.08593
1.11795
1.10696
1.13059
1.07364
1.2236
1.11138
1.13787
1.16686
1.11898
1.13164
1.2886
1.10827
1.11744
1.12667
1.18387
1.11019
0.623871
0.103411
1.10112
1.10702
1.09552
1.08888
1.12717
1.06676
1.20347
1.11457
1.30553
1.10293
1.10334
1.12895
1.14185
1.1236
1.15804
1.1368
1.12602
1.13647
0.68283
1.08449
1.1154
1.08997
1.04471
1.13751
1.11956
1.14138
1.42797
1.09119
1.11998
1.10449
1.13127
1.10804
1.1197
1.09151
1.1161
1.15976
1.02996
0.692224
1.04239
1.04408
1.1354
1.02102
1.06881
1.08685
1.13032
1.11649
1.13796
1.11692
1.73747
1.09889
1.07836
1.0759
1.1212
1.10412
1.03749
1.07527
0.692394
0.157333
0.992886
1.0654
1.12476
1.12759
1.0815
1.06657
1.08758
1.10522
1.10357
1.49879
1.11572
1.12507
1.13789
1.07649
1.13557
1.08559
1.13135
1.04188
0.670821
0.118316
1.07055
1.08153
1.12527
1.1606
1.1081
1.12494
1.14028
1.1096
1.06675
1.1217
1.3226
1.13793
1.13457
1.14036
1.14277
1.11933
1.13133
1.13918
0.665466
0.168235
1.04452
1.0672
1.12308
1.10773
1.11087
1.09725
1.12399
1.08651
1.1435
1.13196
1.15519
1.09009
1.4188
1.11663
1.09726
1.09295
1.13636
1.16108
0.515108
0.232557
1.02179
1.00591
1.07454
1.08029
1.09347
1.08656
1.14314
1.05827
1.10179
1.13984
1.14881
1.41749
1.13743
1.12228
1.10442
1.07366
1.12711
1.11711
0.27948
1.01863
1.00351
1.04523
1.12092
1.1271
1.08427
1.14235
1.07721
1.11553
1.08626
1.09637
1.61838
1.10314
1.11325
1.0896
1.08329
1.0887
1.13075
0.402675
0.45713
0.941049
0.853345
1.17973
1.05862
1.18553
1.02384
1.21975
1.1463
1.07178
1.05834
1.25205
1.08231
1.13786
1.088
1.10183
1.07127
1.09904
1.01798
0.902204
0.472057
0.862731
1.22224
0.808451
1.12407
1.0862
0.926144
1.11756
1.08021
0.844306
2.66607
0.919262
1.12188
1.37017
0.847333
0.852351
0.98823
1.08258
0.86767
0.250169
1.00601
1.07026
1.10698
1.13556
1.15542
1.13744
1.11993
1.12316
1.14599
1.15392
1.10398
1.17452
1.20649
1.10629
1.12248
1.11589
1.13874
1.12054
0.734865
0.254176
1.01979
1.01372
1.11886
1.11395
1.11674
1.15819
1.11398
1.10439
1.09485
1.03371
1.57329
1.11802
1.10243
1.10616
1.08719
1.20061
1.08984
1.12895
0.590159
0.359278
0.978039
1.02256
1.12782
1.10997
1.13019
1.11103
1.07841
1.30544
1.14118
1.11748
1.08877
1.09394
1.11609
1.14513
1.12904
0.984372
1.06179
1.03843
0.810375

## Sheet: Panel E
SI
0.981429
0.98119
0.981071
0.980357
0.980238
0.979762
0.979643
0.977381
0.977143
0.977024
0.975476
0.975357
0.974643
0.974167
0.973929
0.973929
0.972738
0.970238
0.969524
0.968929
0.967024
0.966667
0.965833
0.963571
0.963333
0.96
0.956905
0.955952
0.955833
0.955476
0.952262
0.948929
0.94869
0.942738
0.934286
