# Supplementary material for: Macroscopic control of cell electrophysiology through ion channel expression
Source: eLife. 2022 Nov 9;11:e78075. doi: 10.7554/eLife.78075 (PMC9711524; doi:10.7554/eLife.78075)
Supplement: Figure 3—source data 1. [file elife-78075-fig3-data1.xlsx]

## Sheet: Panel D
3H	2H	1H
0.971605	0.977844	0.953065
0.965844	0.977183	0.953065
0.965432	0.977017	0.953065
0.960494	0.976852	0.94636
0.950617	0.976521	0.94636
0.949383	0.976521	0.94636
0.947737	0.976521	0.94636
0.947325	0.976521	0.94636
0.945679	0.976356	0.936782
0.943621	0.97619	0.936782
0.943621	0.976025	0.936782
0.938272	0.975198	0.930077
0.937037	0.974206	0.930077
0.929218	0.973876	0.930077
0.92716	0.97371	0.930077
0.925103	0.972884	0.929119
0.92428	0.972553	0.926245
0.923868	0.972222	0.926245
0.920988	0.972057	0.925287
0.919342	0.971561	0.909004
0.909053	0.971396	0.909004
0.904938	0.971396	0.903257
0.903292	0.97123	0.901341
0.883951	0.970238	0.898467
0.876132	0.970238	0.896552
0.869959	0.970073	0.896552
0.867901	0.969907	0.881226
	0.969742	0.875479
	0.969742	0.868774
	0.969081
	0.96875
	0.968585
	0.968254
	0.968089
	0.967593
	0.967097
	0.965939
	0.965608
	0.965608
	0.965278
	0.964947
	0.964616
	0.962467
	0.962302
	0.961971
	0.960813
	0.960648
	0.960648
	0.958168
	0.95668
	0.95668
	0.956349
	0.956349
	0.95205
	0.946263
	0.933532

## Sheet: Panel E
peak amplitudes (a.u.)			peak widths (h)			period (h)
3h	2h	1h	3h	2h	1h	3h	2h	1h
0.837444	0.681113	0.648512	1.35698	1.0922	0.483985	2.96666	2.02969	1.03701
0.781814	0.578055	0.811474	1.4782	1.03677	0.497429	2.8015	2.03206	1.03089
0.585286	0.780141	0.849578	1.2668	1.20824	0.525403	2.98478	2.0047	1.02595
0.861568	0.832527	0.706472	1.2712	1.0469	0.475599	2.9801	2.02091	1.03861
0.823982	0.762468	0.832592	1.27026	1.04011	0.523113	2.97502	2.0214	0.993254
0.743313	0.687964	0.699327	1.32612	1.02738	0.485217	2.92056	2.02462	1.03694
0.787849	0.765721	0.910305	1.34857	1.028	0.541208	2.92102	2.03188	0.990937
0.693871	0.732066	0.839992	1.26846	1.02546	0.490936	2.8972	2.02348	1.03067
0.778275	0.789554	0.730581	1.3623	1.03063	0.539057	2.91794	2.03317	1.02653
0.711766	0.778631	0.883643	1.31056	1.03577	0.543536	2.93017	2.02291	0.990944
0.539242	0.752986	0.876315	0.973744	1.0281	0.552467	2.43971	2.02427	0.990769
0.618342	0.717704	0.639258	1.13795	1.03678	0.496356	3.04781	2.03134	1.06901
0.769227	0.53088	0.767346	1.21088	1.03532	0.671064	2.9949	2.02366	0.996998
0.824581	0.605954	0.722168	1.38388	1.03571	0.538473	2.91218	2.02408	1.06019
0.662132	0.659272	0.739	1.33081	1.03468	0.530967	2.25844	2.02379	1.02984
0.809777	0.588551	0.714926	1.39382	1.01353	0.648679	4.06935	2.02761	0.96447
0.740597	0.837869	0.725056	1.55786	1.04761	0.531515	3.31535	2.02086	1.02966
0.809114	0.736132	0.774187	1.19833	1.04138	0.508435	2.919	2.03054	1.03092
0.777393	0.783437	0.622491	1.41572	1.04452	0.433606	2.98638	2.02204	1.01032
0.683707	0.555018	0.685732	1.46564	1.02742	0.456803	2.89905	2.04491	1.10878
0.694214	0.621679	0.846757	1.02254	1.03408	0.526527	2.36065	2.03343	1.02779
0.848407	0.789415	0.734196	1.11175	1.04055	0.493012	2.37771	2.03085	1.03401
0.850292	0.758482	0.764562	1.12471	1.0311	0.47873	2.94523	2.02333	1.00683
0.873984	0.746575	0.788853	1.3359	1.03461	0.476613	2.97265	2.013	1.04022
0.765452	0.723515	0.922657	1.7042	1.04104	0.529713	2.68541	2.03155	0.993971
0.669603	0.773802	0.767044	1.40636	1.04417	0.502239	2.28759	2.02997	1.00154
0.716924	0.745735	0.862248	1.41317	1.04316	0.541877	2.89884	2.02177	1.02457
	0.65391	0.606205		1.03521	0.475324		2.03294	1.03561
	0.745892	0.92161		1.04013	0.523184		2.041	1.02834
	0.668597			1.01741			2.02787
	0.689789			1.02288			2.02614
	0.715904			1.01758			2.03412
	0.753976			1.02856			2.03357
	0.759888			1.03011			2.03411
	0.739458			1.03103			2.03336
	0.531576			0.99138			2.03352
	0.730875			1.0245			2.0355
	0.616515			1.02448			2.02506
	0.570592			1.01436			2.03793
	0.756889			1.04209			2.02205
	0.738258			1.03774			2.03146
	0.640809			1.02578			2.03561
	0.690202			1.02007			2.03665
	0.764937			1.03681			2.03286
	0.773689			1.03914			2.03152
	0.666806			1.02224			2.02577
	0.591131			0.986462			2.03497
	0.686578			1.03937			2.03229
	0.858734			1.04967			2.01984
	0.770674			1.04405			2.03097
	0.674789			1.04234			2.01403
	0.830186			1.03983			2.02241
	0.711089			1.04253			2.03131
	0.66632			1.03202			2.04247
	0.667171			1.02172			2.03599
	0.667502			1.02815			2.03555
